# 1 **Visual physiology of the Layer 4 cortical circuit *in silico***

2 Anton Arkhipov<sup>1\*</sup>, Nathan W. Gouwens<sup>1</sup>, Yazan N. Billeh<sup>1</sup>, Sergey Gratiy<sup>1</sup>, Ramakrishnan Iyer<sup>1</sup>,  
3 Ziqiang Wei<sup>2</sup>, Zihao Xu<sup>3</sup>, Jim Berg<sup>1</sup>, Michael Buice<sup>1</sup>, Nicholas Cain<sup>1</sup>, Nuno da Costa<sup>1</sup>, Saskia de  
4 Vries<sup>1</sup>, Daniel Denman<sup>1</sup>, Severine Durand<sup>1</sup>, David Feng<sup>1</sup>, Tim Jarsky<sup>1</sup>, Jerome Lecoq<sup>1</sup>, Brian Lee<sup>1</sup>,  
5 Lu Li<sup>1</sup>, Stefan Mihalas<sup>1</sup>, Gabriel K. Ocker<sup>1</sup>, Shawn R. Olsen<sup>1</sup>, R. Clay Reid<sup>1</sup>, Gilberto Soler-Llavina<sup>4</sup>,  
6 Staci A. Sorensen<sup>1</sup>, Quanxin Wang<sup>1</sup>, Jack Waters<sup>1</sup>, Massimo Scanziani<sup>5</sup>, Christof Koch<sup>1</sup>

7

## 8 **Affiliations**

9 <sup>1</sup> Allen Institute for Brain Science, Seattle, Washington 98109, USA

10 <sup>2</sup> Janelia Research Campus, Howard Hughes Medical Institute, Ashburn, Virginia 20147, USA

11 <sup>3</sup> University of California San Diego, La Jolla, CA 92093, USA

12 <sup>4</sup> Novartis Institutes for BioMedical Research, Cambridge, MA 02139, USA

13 <sup>5</sup> Howard Hughes Medical Institute and Department of Physiology, University of California San  
14 Francisco, San Francisco, California 94143, USA.

15 \* Corresponding author: [antona@alleninstitute.org](mailto:antona@alleninstitute.org).

16

17

18

19 **ABSTRACT**

20 Despite advances in experimental techniques and accumulation of large datasets concerning the  
21 composition and properties of the cortex, quantitative modeling of cortical circuits under in-vivo-like  
22 conditions remains challenging. Here we report and publicly release a biophysically detailed circuit  
23 model of layer 4 in the mouse primary visual cortex, receiving thalamo-cortical visual inputs. The  
24 45,000-neuron model was subjected to a battery of visual stimuli, and results were compared to  
25 published work and new in vivo experiments. Simulations reproduced a variety of observations,  
26 including effects of optogenetic perturbations. Critical to the agreement between responses in silico  
27 and in vivo were the rules of functional synaptic connectivity between neurons. Interestingly, after  
28 extreme simplification the model still performed satisfactorily on many measurements, although  
29 quantitative agreement with experiments suffered. These results emphasize the importance of  
30 functional rules of cortical wiring and enable a next generation of data-driven models of in vivo neural  
31 activity and computations.

32

33

34 **AUTHOR SUMMARY**

35 How can we capture the incredible complexity of brain circuits in quantitative models, and what can  
36 such models teach us about mechanisms underlying brain activity? To answer these questions, we set  
37 out to build extensive, bio-realistic models of brain circuitry employing systematic datasets on brain  
38 structure and function. Here we report the first modeling results of this project, focusing on the layer 4  
39 of the primary visual cortex (V1) of the mouse. Our simulations reproduced a variety of experimental  
40 observations in a large battery of visual stimuli. The results elucidated circuit mechanisms determining  
41 patterns of neuronal activity in layer 4 – in particular, the roles of feedforward thalamic inputs and  
42 specific patterns of intracortical connectivity in producing tuning of neuronal responses to the  
43 orientation of motion. Simplification of neuronal models led to specific deficiencies in reproducing  
44 experimental data, giving insights into how biological details contribute to various aspects of brain  
45 activity. To enable future development of more sophisticated models, we make the software code, the  
46 model, and simulation results publicly available.

47

## 48 INTRODUCTION

49 Although our knowledge of the cortex has been improving dramatically thanks to the ongoing revolution  
50 in experimental neuroscience methods, the field is still far from an overall understanding of cortical  
51 circuits and their specific function. One essential component necessary to address this problem is the  
52 development of data-driven quantitative models that integrate experimental information and enable  
53 predictive simulations under a wide range of realistic *in-vivo*-like conditions – following the dictum  
54 attributed to Richard Feynman, “What I cannot create, I do not understand” [1]. Whereas detailed data-  
55 driven models of cortical tissue have been reported (e.g., [2]; see also [3]), modeling applications to an  
56 *in-vivo*-like regime have been limited (although see, e.g., [4] and references therein).

57 A typical systems neuroscience experiment involves a battery of different stimuli and, ideally,  
58 perturbations of the investigated circuit. Reproducing this in simulations of a data-constrained cortical  
59 model has proven challenging. To investigate the feasibility of *in-vivo*-like comprehensive simulations,  
60 and to build a platform for further studies, we set out to simulate a set of visual physiology experiments  
61 in the mouse primary visual cortex (area V1), with the emphasis on the first step in the cortical  
62 processing of visual information – namely, modeling the V1 input layer, the layer 4 (L4). We decided  
63 early on to replicate a small set of what we consider to be canonical physiological findings characterizing  
64 cells in L4 of V1. Given the thousands or more of published experiments carried out over the years in  
65 this region of cortex, our list is small, non-exclusive and may be considered idiosyncratic by some.  
66 However, we believe it is critical to start somewhere solid before generalizing indiscriminately. Our list  
67 of explored phenomena includes the approximately log-normal distributions of firing rates [5],  
68 orientation selectivity [6, 7, 8, 9], oscillatory population dynamics [10, 11, 12, 13, 14, 15], sparsity of  
69 responses to natural stimuli [16], amplification of thalamic inputs by recurrent connections [17, 18, 19,  
70 20, 21, 22, 23], preferential connectivity among similarly tuned neurons [24, 25, 26, 27, 28, 29], and a  
71 number of others.

72 The model was constructed in a data-driven fashion from what is known about the L4 circuit  
73 organization. Although the model was biophysically detailed, we also used simplifications whenever  
74 possible, typically choosing computationally inexpensive approximations for biological mechanisms. A  
75 crucial component was a set of filters that represented visual information processing from image to the  
76 output of the lateral geniculate nucleus (LGN) of the thalamus, which projects to L4. This feature  
77 enabled one to use arbitrary movies as visual stimuli. We presented the same or similar sets of stimuli  
78 to the model and to mice in experiments and then compared the *in silico* and *in vivo* responses.

79 We asked three major questions: (1) How well does our model reproduce experimentally observed  
80 neural responses from the above list? (2) What are the major mechanisms that determine the neuronal  
81 activity patterns? And (3), how does the ability to reproduce experimental recordings depend on the  
82 level of granularity of the model?

83 To address (1), we assessed neuronal responses to artificial (e.g., drifting gratings) and naturalistic (e.g.,  
84 movies) stimuli and selected a number of features of these responses that are generally considered  
85 important and interesting in the field. We then benchmarked the model performance on these features  
86 against the experimental data. Whereas typically models are developed to explain a specific  
87 phenomenon and may aim to reproduce 1-2 observed quantities, the key element in our study was to

88 observe generalization over a wide variety of visual stimuli and response features. We found that our  
89 simulations reproduced many of experimental observations (with some exceptions) under a range of  
90 different stimuli.

91 For (2), we performed *in silico* experiments to investigate how individual neurons process inputs from  
92 different sources and how recurrent connections shape the network activity. This approach relied in  
93 part on simulated optogenetic experiments paralleling *in vivo* optogenetic studies. The most striking  
94 observation was that tuning properties of neurons were critically affected by the functional connectivity  
95 rules.

96 For question (3), we introduced two much simplified versions of our model, where biophysical neuron  
97 models were replaced by point-neuron models with either instantaneous or time-dependent course of  
98 synaptic action, and compared simulations of these simplified networks with the biophysical case. We  
99 found that, although the simplified network models qualitatively reproduced the trends observed in the  
100 biophysical simulations, the quantitative agreement with experiment suffered. The time-dependent  
101 synaptic kinetics in the simplified model allowed for better agreement with the biophysical model and  
102 experiment, such as, for example, in terms of producing oscillations in a gamma range.

103 No circuit in the brain exists in isolation, but including all the brain complexity in the model is impossible  
104 at present due to absence of data and inadequate computing resources. Therefore, we attempted to  
105 build a model of L4 of V1, which can be handled with available resources and for which a substantial  
106 amount of information could be found. The good performance of the model compared to the  
107 experiment may indicate a relative compartmentalization of L4 computation (see Discussion); this  
108 should not be expected everywhere in the cortex. Our L4 model provides a comprehensive  
109 characterization of activity and mechanisms in this cortical circuit and may serve as a stepping-stone for  
110 future, more sophisticated studies of all cortical layers. To enable this, we make the software code, the  
111 model, and simulation results publicly available (see SI).

112

113

## 114 **RESULTS**

### 115 **Construction and optimization of the model**

116 The network (**Fig. 1a, b**) consisted (see Methods) of models of individual neurons [30] from an early  
117 version of the Allen Cell Types Database [31], employing compartmental representation of somato-  
118 dendritic morphologies (~100-200 compartments per cell) and 10 active conductances at the soma that  
119 enabled spiking and spike adaptation. Although recent additions to the Allen Cell Types Database  
120 include models of neurons with active conductances in the dendrites as well, those models are very  
121 computationally expensive, which was prohibitive for the breadth of our study (see below). In addition,  
122 in terms of somatic spike output, the current versions of such models do not exhibit much better  
123 performance than the models with active conductances restricted to the soma [31], and, thus, we used  
124 these latter, cheaper models. The cells were distributed uniformly in a cylinder ~400  $\mu\text{m}$  in radius,  
125 representing the central portion of V1, and 100  $\mu\text{m}$  height with density of 200,000  $\text{mm}^{-3}$  [32]. Five single  
126 neuron models represent five “types” of neurons – three major excitatory groups as determined by Cre-  
127 lines (Scnn1a, Rorb, Nr5a1, 85% of all cells) and two groups of parvalbumin-positive fast-spiking

128 interneurons (15%, denoted as PV1 and PV2), which form the majority of interneurons in L4 [33]. All  
129 10,000 biophysical cells were exact copies of these five models. The cell models correspond to regular-  
130 spiking excitatory cells and fast-spiking interneurons (PV+); whereas non-PV+ interneurons do exist in  
131 L4, they are a relative minority [33], and therefore were neglected for simplicity. Furthermore, 35,000  
132 much simpler leaky-integrate-and-fire (LIF) neurons, with only two groups – excitatory and inhibitory –  
133 were placed around the biophysically detailed “core” to prevent boundary artefacts (see SI). The  
134 complete model accounted for over half of V1 L4 cells (45,000 out of ~70,000). Below, we primarily  
135 focus on the properties of the biophysical core circuit.

136 Three independent instantiations were generated using different random seeds. The connectivity and  
137 inputs into these three model instantiations were distinct, but all followed the rules described below.  
138 All simulations were performed using the python 2.7 code (an early version of the BioNet package [35])  
139 employing NEURON 7.4 [34].

140 Recurrent connections (**Fig. 1c**) were established randomly according to probability decaying with  
141 intersomatic distance (e.g., [36]). Recent experiments [25, 26, 27, 29] showed that excitatory neurons in  
142 the mouse V1 L2/3 exhibit more likely and stronger connections if neurons prefer similar stimuli (“like-  
143 to-like connectivity”). We sought to investigate how such a rule affects neural activity. The rule (**Fig. 1d**)  
144 was applied to all excitatory cells by assigning a preferred orientation to each excitatory neuron (which  
145 was also used to select LGN inputs, see below) and using the difference between such orientations to  
146 compute a probability of connection. A similar like-to-like rule was applied to the amplitude of synaptic  
147 weights (**Fig. 1e**). The like-to-like rules were parameterized to correspond approximately to the  
148 observations for L2/3 [25] (**Fig. 1f**) and did not apply to pairs containing one or more inhibitory neurons.  
149 See Methods for further details.

150 We directly converted visual stimuli to spikes of LGN cells (which provide the input to L4) via linear  
151 space-time separable filters (**Fig. 1g**; [37, 38]) of ON, OFF, and ON/OFF types (see Methods), all of which  
152 produced relatively transient responses. Such a considerable simplification of the wide variety of  
153 response types that the LGN cells exhibit (see, e.g., [17]) was necessary to make the model tractable,  
154 especially because rules of connectivity from various functional LGN cell types and L4 in the mouse are  
155 largely unknown. Because the retinotopy of the complete model did not cover the entire field of view,  
156 we employed 9,000 LGN filters – approximately half of the mouse LGN. Based on the experimental data  
157 about receptive fields of L4 neurons [17, 32], we used retinotopy of L4 cells to “pool” inputs from LGN  
158 filters with similar retinotopy, and the assigned preferred orientation (see above) to establish the  
159 geometry of the ON and OFF subfields (**Fig. 1g**; see Methods, **Fig. 7**). This helped to establish orientation  
160 selectivity in the combined LGN inputs to individual L4 cells [32]. Interestingly, we found that in our  
161 model the L4 cells that were connected to each other had a higher chance to receive inputs from the  
162 same LGN cells, in comparison with unconnected L4 cells (see Methods, **Fig. 7d**). This is consistent with  
163 recent experimental observations for L4 and L2/3 cells [27].

164 The numbers of synapses for recurrent connections were chosen based on the literature (see Methods).  
165 Using electron microscopy (EM), we found (**Fig. 1h**) that LGN synapses constitute 15-30% of all synapses  
166 in the neuropil in L4 (see Methods for details), consistent with observations for mouse S1 and M1 [39].  
167 This corresponds to over 1,000 synapses from the LGN per excitatory L4 neuron (given ~8,000 synapses  
168 total per mouse V1 cell [32] on average, we assume relatively small L4 neurons to receive ~6,000  
169 synapses). Thus, the number of LGN-to-L4 synapses is an order of magnitude higher in the mouse than

170 in the cat V1 (for which this number has been long established to be ~100 [40]). These new data  
171 determined the numbers of LGN-to-L4 synapses in the model (see Methods for further details). For  
172 majority of connections, multiple synapses per connection were assigned, typically in the 3-7 range (see  
173 Methods). Synaptic dynamics was described by a sum of two decaying exponentials. We assumed no  
174 short-term plasticity as it is plausible that *in vivo* synapses operate at steady-state conditions [18]. Long-  
175 term plasticity was neglected because simulations covered several seconds at most.

176

177

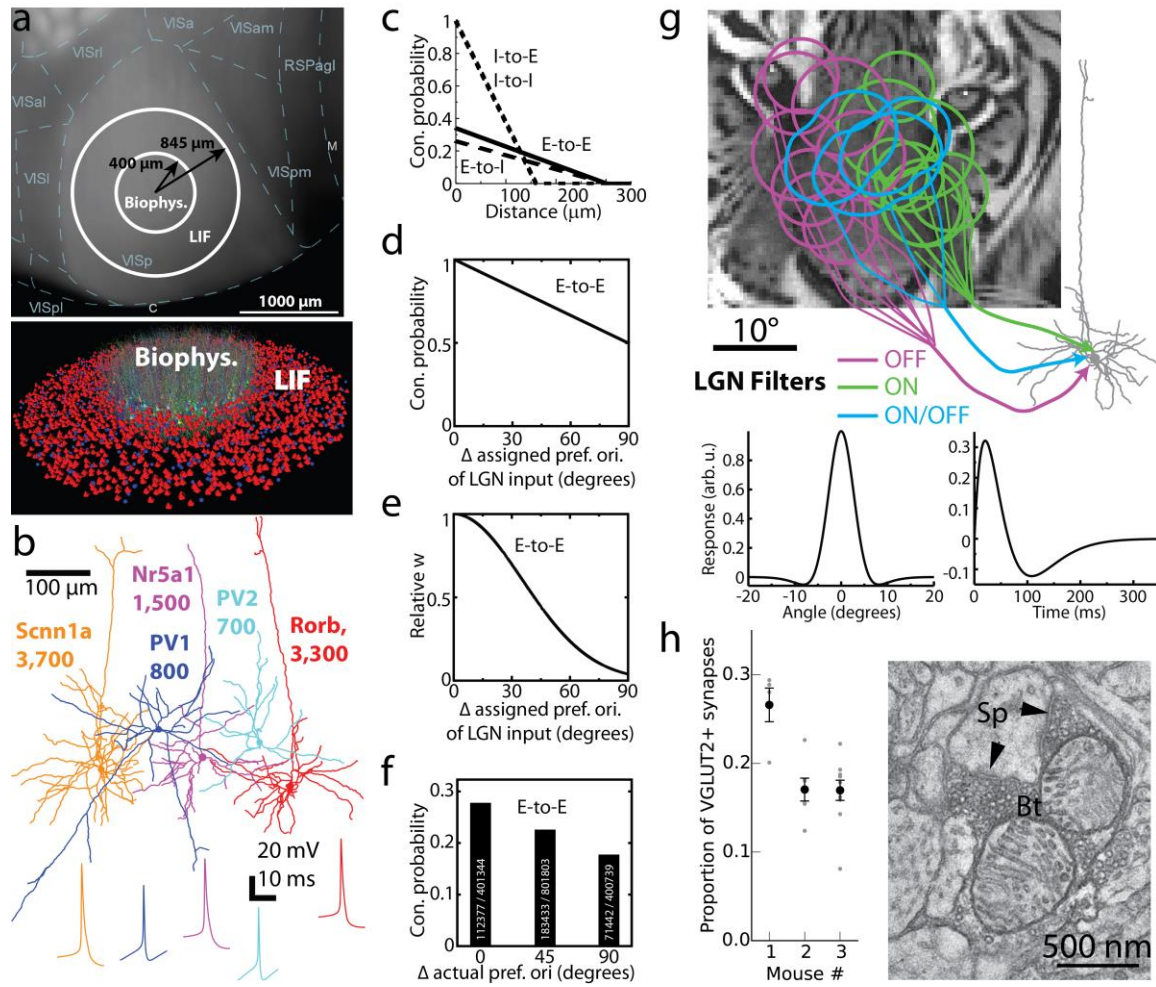

178

179 **Figure 1.** Construction of the model. (a) The biophysical and LIF portions of the model on the cortical  
 180 surface with delineations of cortical areas (top; “VISp” is V1; the other labels starting with “VIS”  
 181 correspond to higher visual areas) and with individual cells rendered (bottom; only a small subset of  
 182 cells is shown for clarity). (b) Morphologies and action potential shapes of the five neuron models used  
 183 to generate the L4 network; numbers of cells of each type are listed. (c-e) Connection probability (c,d)  
 184 and synaptic weights (e) of excitatory (E) or inhibitory (I) cell targets and sources. The rules incorporate  
 185 the dependence on the distance between somata (c) or difference of the assigned preferred  
 186 orientations,  $\Delta ori$  (d, e). Rules dependent on  $\Delta ori$  were applied to E-to-E connections only, and synaptic  
 187 weights for all connections were independent of distance. (f) Connection probability computed for cells  
 188 within 50 μm using actual preferred orientation observed in simulations (cf. [24]). Numbers of  
 189 connected and total pairs, used to obtain the probability, are shown inside the bars. (g) Three types of  
 190 LGN filters (ON, OFF, and ON/OFF), superimposed onto an image, providing inputs to a L4 cell. Example  
 191 filter’s spatial and temporal profiles are at the bottom. (h) The proportion of excitatory thalamocortical  
 192 synapses (VGLUT2<sup>+</sup>) in the neuropil of V1 L4, as determined experimentally using EM. Proportions for  
 193 individual samples of tissue are in gray; mean and s.e.m. for each mouse are in black. Right, an  
 194 exemplar EM image of a putative VGLUT2<sup>+</sup> synapse from the LGN onto an L4 neuron (Sp, spine; Bt,  
 195 bouton; arrows: postsynaptic densities within the spine).

196

197 To account for inputs from the rest of the brain and for different brain states, we introduced externally  
198 generated waves of background activity sweeping across the L4 model (**Fig. 2a**), inspired by reports of  
199 activity propagation over cortical surface *in vivo* [41]. Poisson spike generators were distributed within  
200 the cortical plane and were activated whenever the wave swept through their positions, sending spikes  
201 to the nearby L4 cells. This enabled the L4 model (**Fig. 2b**) to operate with an extremely simple analogue  
202 of distinct cortical states (see, e.g., [42, 43, 44]), which we call “Bkg. on” and “Bkg. off.” (see Methods).  
203 The random generation of the background waves, as well as random generation of background spike  
204 trains from the wave profiles and of LGN spike trains from deterministic filter outputs were the sole  
205 sources of indeterminacy, leading to differences between individual trials.

206 After the steps above, all parameters were fixed except the synaptic weights (conductance amplitudes).  
207 The LGN-to-L4 weights were selected to produce experimentally observed excitatory currents from LGN  
208 [17]. The weights for recurrent connections were then manually optimized, while constraining post-  
209 synaptic potentials and currents (PSPs and PSCs) to the experimentally reported range for mouse cortex  
210 [45] (see Methods). Optimization was limited to two training stimuli – a single trial of a drifting grating  
211 and one of a gray screen, 500 ms each. The target was to reproduce the mean spontaneous firing rate  
212 and the rate in response to the preferred grating ( $R_{max}$ ), while avoiding synchronous epileptic-like  
213 activity. Published data from [N6] were used for this optimization, before our own experiments were  
214 finalized. After optimizing the synaptic weights using this limited training set, we applied the model  
215 without any further modification to all the other stimuli, which served as a test set. The exact synaptic  
216 weights obtained during the optimization stage may not represent a unique solution, due to degeneracy  
217 [46]. Nevertheless, it is reassuring that synaptic properties from our optimized models were consistent  
218 with published experimental reports (see **Fig. S2**), exhibiting, e.g., current amplitudes of ~10-30 pA for  
219 excitatory and ~40-60 pA for inhibitory synapses [45] or voltage amplitudes of ~1 mV [47] for L4  
220 excitatory-to-excitatory connections (as measured at the soma).

221

## 222 **Benchmarking simulated neuronal activity to the experimental data**

223 How well does the model reproduce experimentally observed neural responses *in vivo*? The answer will  
224 depend on the types of stimuli and features of responses to those stimuli that one chooses for  
225 comparison. We reasoned that a successful model should be versatile; in other words, it is not sufficient  
226 to be able to model responses to one type of stimuli well, and instead one should strive to reproduce  
227 features across many types of stimuli. Therefore, our battery of visual stimuli included gray screen, a  
228 variety of drifting gratings, 10 natural images, 3 natural movie clips, 2 types of full-field flashes, and 4  
229 moving-bar stimuli (see example responses in **Fig. 2c-e**; see also Methods, **Fig. S3**, and **Table S2**).  
230 Altogether, ~3,600 simulations were carried out. Our own experiments used for benchmarking  
231 consisted of two series of extracellular electrophysiological recordings in mouse V1 employing multi-  
232 electrode silicon probes. In the first [7], responses to drifting gratings with a variety of spatial and  
233 temporal frequencies were measured, in both awake and anesthetized mice. In the second (previously  
234 unpublished), spontaneous activity (responses during gray screen presentation) as well as responses to  
235 natural movies, natural images, full-field flashes, and other stimuli were recorded in awake mice.

236



237 We chose several features of visual responses that are generally considered important and are often  
238 reported in the field of cortical visual physiology and compared their values between experiment and  
239 simulations (**Fig. 3**). It should be noted that, although the measured metrics differed slightly among the  
240 three excitatory cell types (Scnn1a, Rorb, and Nr5a1), as well as among the two inhibitory types (PV1  
241 and PV2), we do not ascribe significance to these differences. This is because during model construction  
242 and optimization no experimental data was available on distinctions in response features or connectivity  
243 between these L4 cell populations, and, in absence of either, we assumed the same optimization targets  
244 for all excitatory or inhibitory cells (which, however, allowed for ~1 Hz rate deviation from the target,  
245 resulting in different types settling at slightly different activity levels).

246 The first characteristic we checked is whether neuron firing rates follow a positively-skewed, log-normal-  
247 like distribution, which is a ubiquitous hallmark feature of brain activity *in vivo* [5]. Such distributions  
248 were indeed observed in our simulations for spontaneous activity and all types of visually-driven  
249 responses (**Fig. 3a, S5a**). Consistent with published reports, our simulated rate distributions spanned 2-  
250 3 decades and may widen further in longer simulations (for instance, spontaneous rates were computed  
251 from 20 trials of 500 ms each, resulting in the lowest possible rate of 0.1 Hz). Also in agreement with  
252 literature [5], individual neurons tended to keep their low or high firing rates across different stimulus  
253 conditions (**Fig. 3a**, top). The positive skewness of firing rate distribution (i.e., the third standardized  
254 moment,  $\langle ((f - \langle f \rangle) / \sigma_f)^3 \rangle$ , where  $f$  is the firing rate and  $\sigma_f$  is its standard deviation, both computed  
255 in the linear (i.e., not log) firing-rate space) was typically between 0 and 4 (**Fig. S5a**). While it is hard to  
256 expect an exact match of the experimental skewness distributions from our relatively rough model, it is  
257 reassuring that the model reproduced the overall experimental trends of firing rate distributions with  
258 positive skewness in the 0-4 range. Note that a normal distribution has zero skewness, whereas log-  
259 normal distribution has positive skewness.

260 The mechanisms underlying log-normal like distributions of activity of individual neurons *in vivo* are not  
261 well understood [5], and may involve both cell-intrinsic and network phenomena. Our model does not  
262 clarify the potential contribution of the former, since all cell types were tuned to the same target rates  
263 (apart from the excitatory/inhibitory distinction), but sheds light on the latter. We found that, when  
264 similar levels of background excitation were applied to all cells, spontaneous rates were either zero or  
265 uniformly close to the mean, whereas log-normally distributed strength of background inputs (see **Fig.**  
266 **S1c**) resulted in spontaneous firing rates distributed over 2 or more decades. In a highly simplified  
267 approximation, one may consider that under visual stimulation cells preferring a given stimulus may  
268 increase their firing by about an order of magnitude, whereas activity of all other cells remains more or  
269 less the same as under no stimulation. Thus, given log-normal distribution of spontaneous rates, one  
270 expects that the distribution under visual stimulation remains largely the same, perhaps slightly wider,  
271 which is indeed what we observe (**Fig. 3a**). This emphasizes the importance of enabling log-normal like  
272 distribution of spontaneous rates, and our work suggests that log-normally distributed strength of  
273 inputs that cells receive (potentially, from non-local sources) may play a big role in this, although other  
274 mechanisms cannot be excluded.

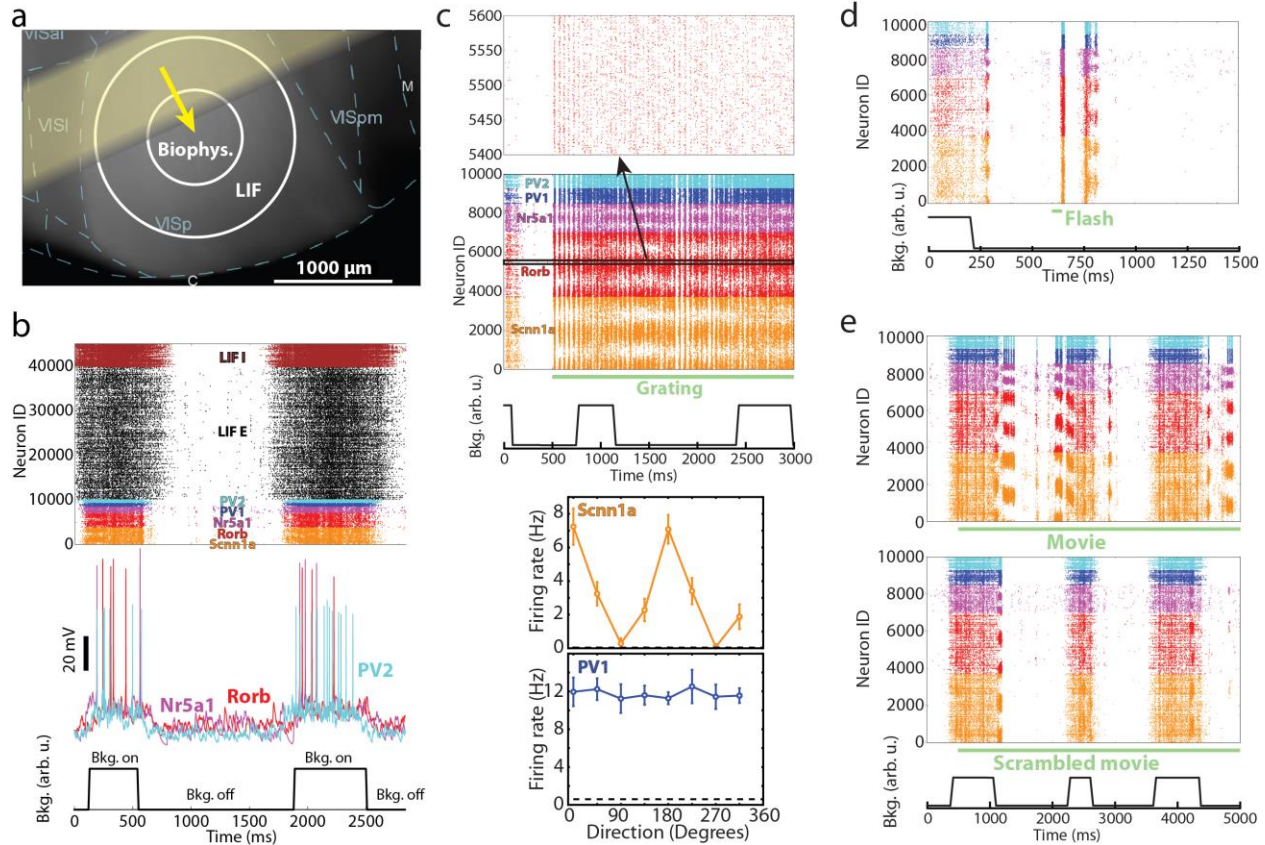

275

276 **Figure 2.** Examples of simulated responses to various visual stimuli. (a) Spontaneous activity in the  
 277 model was generated by waves of background excitation (“Bkg. on”, yellow arrow denotes the direction  
 278 of motion of the yellow bar-like region) alternated with intervals of no background excitation (“Bkg.  
 279 off”). (b) Model activity in a gray screen trial. Examples of membrane potential traces from simulated  
 280 biophysical cells are in the middle. (c) Spike raster in response to a drifting grating (TF = 4 Hz, at 0  
 281 degrees direction). Bottom, example orientation tuning curves for an excitatory and inhibitory cell from  
 282 simulation. (d) Spikes in response to a 50 ms full-field flash. (e) Spike raster for a single trial of a natural  
 283 movie (top) and for a temporally scrambled version of the same movie (bottom). The raster in (b) shows  
 284 all neurons and those in (c-e) for clarity show the 10,000 cells in the biophysical core of the model (inset  
 285 on top of (c) zooms in on 200 cells). All rasters are examples from one trial; all trials used unique  
 286 combinations of “Bkg. on” and “Bkg. off” states (shown at the bottom of plots), which overlapped (or  
 287 not) in different ways with the visual stimuli.

288

289 Another aspect of activity that we checked was whether the magnitude of responses was consistent  
290 with the experiment; presumably, it is important for network computations that cells of certain types  
291 fire at certain rates in response to particular stimuli. For this purpose, we considered the rates of  
292 spontaneous activity and maximal rates ( $R_{max}$ ) in response to drifting gratings (**Fig. 3b**; see Methods for  
293 definitions). The spontaneous rates were 0.5-1.0 Hz for excitatory and 1.5-2.0 Hz for inhibitory cells,  
294 broadly consistent with our experimental measurements and published data [N6], and  $R_{max}$  levels were  
295 also similar to experimental ones.

296 Furthermore, the L4 responses to gratings are known to exhibit orientation and direction selectivity  
297 (e.g., [6, 7]). We found that the orientation selectivity index (OSI; see Methods) for excitatory cells was  
298  $\sim 0.4$ - $0.5$  on average, in excellent agreement with the experiments (**Fig. 3b**). For inhibitory cells, OSI was  
299  $\sim 0.05$  on average, whereas the experimental value was  $\sim 0.3$ . The relatively low OSI values were due to  
300 non-selective thalamic inputs and recurrent connectivity for inhibitory cells (see Methods), which were  
301 chosen that way at model construction to conform to an often-expressed view that excitatory cells are  
302 tuned and inhibitory fast-spiking cells are not. However, recent experiments [33], as well as our own  
303 data (**Fig. 3b**), suggest moderate levels of tuning for these neurons, and therefore future models will  
304 need to reflect these observations better. Nevertheless, qualitatively the model already captures the  
305 trend of better tuning of excitatory cells compared to inhibitory fast-spiking cells. Another much studied  
306 aspect of orientation tuning in the cortex is its contrast invariance in excitatory neurons (see, e.g., [8,  
307 9]). Excitatory neurons in our simulations were strongly orientation-tuned for contrast as low as 10%  
308 (**Fig. S5c**). We computed the differences of the half-width at half-height of the tuning curves at high and  
309 low contrasts for each cell ( $\Delta HWHH$ ) and found (**Fig. S5d**) that the distribution of  $\Delta HWHH$  sharply  
310 peaked near zero. On average, the difference was  $4 \pm 5$  degrees for 80% vs. 10% and  $-2 \pm 4$  degrees  
311 for 80% vs. 30% contrasts (i.e., the average was within the standard deviation in both cases). Thus, our  
312 model exhibited substantial robustness of tuning curves to contrast (although perhaps not to the full  
313 extent of the real mouse V1 [8]).

314 By contrast to OSI, the model performed poorly on the direction selectivity index (DSI; **Fig. 3b**), which  
315 was close to zero in simulations, whereas experimentally it was  $\sim 0.4$ - $0.5$ . This was due to the extreme  
316 simplicity of the LGN inputs, which were constructed based on the experimental data, but at this point  
317 did not include all types of LGN activity observed experimentally [7, 17, 21]. In particular, for simplicity,  
318 we did not include the sustained LGN responses (i.e., all LGN filters produced transient responses),  
319 whereas the most recent experimental data suggest a critical role for the interplay between sustained  
320 and transient LGN inputs in generating direction selectivity in V1 [23]. Proper incorporation of direction  
321 selectivity is the subject of ongoing work on the next generation of the model.

322 Another important aspect of neuronal activity *in vivo* is the population-level oscillatory rhythms, which  
323 are observed in a variety of frequency bands. Whereas oscillations at many of such frequencies are  
324 likely caused by non-local interactions in the brain, and therefore cannot be expected to arise in an  
325 isolated L4 model, some of them may be generated locally. Indeed, our simulations exhibited  
326 oscillations in the 15-50 Hz range (sometimes referred to as “mouse gamma”), with a peak at  $\sim 20$  Hz  
327 (**Fig. 3c**). This is consistent with extracellular electrophysiology data [10], which exhibits a particularly  
328 strong peak at similar frequencies in L4.

329 Global luminance changes present another challenge to models, due to simultaneous engagement of all  
330 cells by these stimuli. We studied responses to 50 ms full-field flashes and observed, in both experiment

331 and simulations, that a sharp and fast peak in activity was evoked by the first white-to-gray transition,  
332 followed by a second smaller and wider peak (**Figs. 2d, 3d**). The magnitude of the first peak was about  
333 2-4 times higher in simulation than in the experiment, whereas that of the second peak was  
334 approximately the same, and the time course of the response was uniformly ~2-fold faster in  
335 simulations (**Fig. 3d, e** and **Fig. S5b**). These differences were most likely again caused by the absence of  
336 sustained LGN responses in the model. Importantly, however, in both simulations and experiments, the  
337 second peak was delayed – instead of 50 ms (the flash duration), it appeared 100 ms after the first (200  
338 ms in the experiment). This reflects a known phenomenon of suppression following luminance change,  
339 where the second peak corresponds to release from inhibition (e.g., [48, 49]). Thus, qualitatively the  
340 model reproduces well the critical features of cortical responses to global luminance change, which  
341 likely affect perception of visual stimuli (such as in, e.g., luminance-induced visual masking).

342 Finally, an essential observation is that natural scenes evoke responses in V1 that are substantially  
343 different from those evoked by artificial stimuli such as gratings. This was the case in simulations – for  
344 example, responses to a natural movie in **Fig. 2e** were very distinct from those to a horizontally drifting  
345 grating in **Fig. 2c** (both use the same ID labels). For a grating, cells with certain IDs respond strongly  
346 throughout the simulation (as they prefer the grating's orientation). By contrast, natural movies evoked  
347 episodes of concerted responses in distinct populations of cells (which share similar orientation  
348 preference). Notably, such concerted responses were mostly absent when movie frames were shuffled  
349 in time (**Fig. 2e**, bottom). To quantify the differences, we computed lifetime sparsity for each cell  
350 following Vinje and Gallant [50] (see Methods). Sparsity was higher for movies than for gratings (**Fig. 3f**)  
351 in both simulations and experiments, consistent with previous observations (including Ca<sup>2+</sup> imaging  
352 [16]): 0.77+/-0.16 in simulation vs. 0.71+/-0.22 in experiments for movies and 0.64+/-0.14 vs. 0.65+/-  
353 0.25 for gratings.

354

355

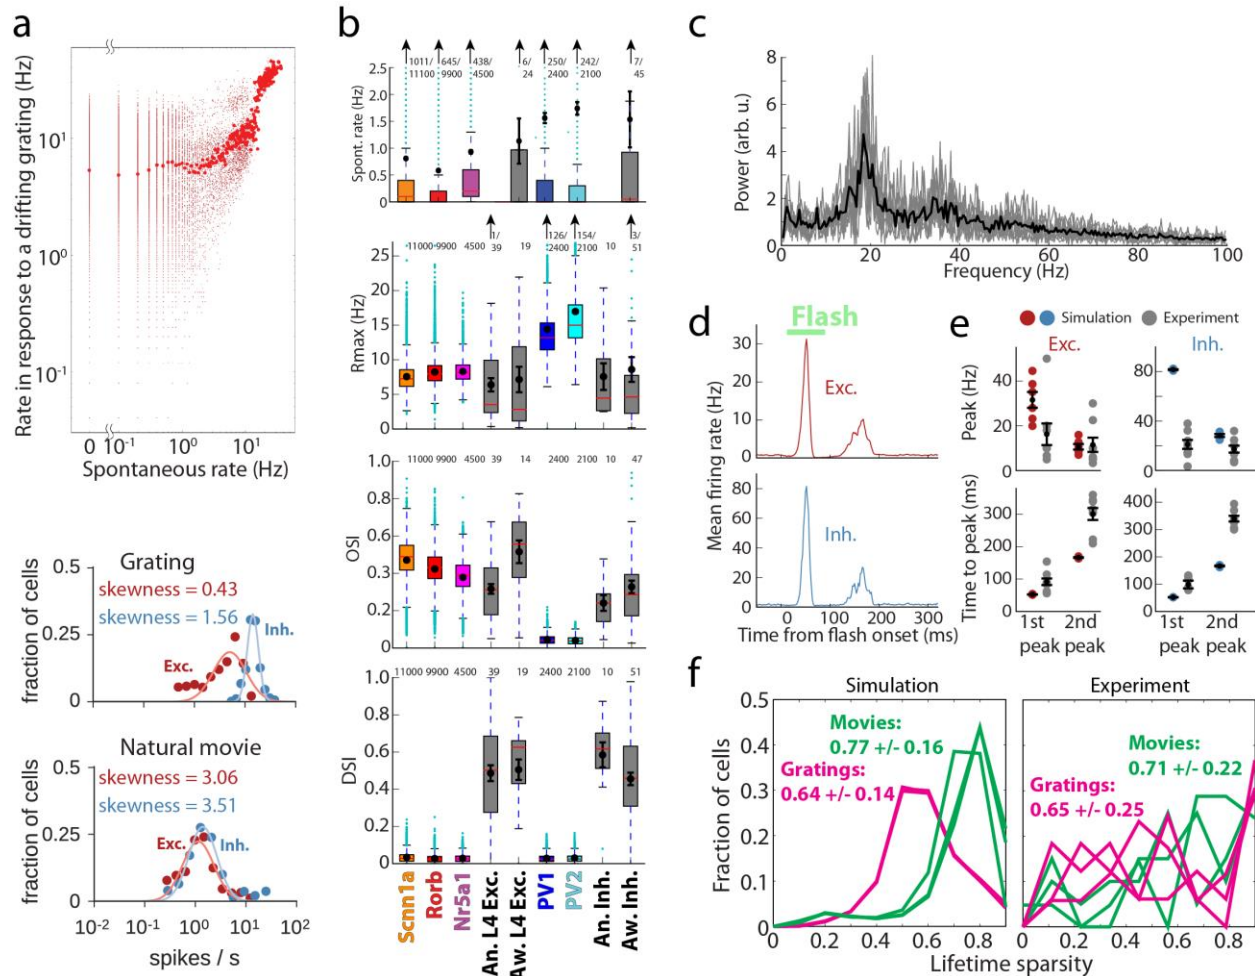

356

357 **Figure 3.** Benchmarking the simulation results. (a) Log-normal like distribution of firing rates. Top,  
 358 firing rates of all biophysical cells from three models during spontaneous activity and in response to a  
 359 drifting grating, averaged over 10 trials. Large red dots are firing rates averaged over all cells in 0.1 Hz  
 360 bins over the spontaneous activity axis. Bottom, examples of firing rate distributions on a log scale for  
 361 a single trial. Solid lines indicate log-normal fits of the data. (b) Comparison of the spontaneous rates,  
 362 maximal rates in response to gratings ( $R_{max}$ ), orientation selectivity index (OSI), and direction selectivity  
 363 index (DSI) between the simulation (by cell type, color) and experimental measurements using  
 364 extracellular electrophysiology (gray). See Methods for details on the elements of the box plots shown  
 365 here and in other figures. “An.” – experiments in anesthetized mice, “Aw.” – in awake mice. (c) The  
 366 local field potential (LFP; see Methods) measured at the center of the L4 model, for a drifting grating.  
 367 The spectra from 10 trials are shown in gray, and the averaged spectrum is in black. (d) The model PSTH  
 368 in response to a 50 ms flash (average over all biophysical excitatory cells, all models, and all trials, in 2  
 369 ms bins). (e) The magnitude and time-to-peak (from flash onset) for the first and second peaks of the  
 370 response to the 50 ms flash, for both simulation and electrophysiological data. (f) Distributions of  
 371 lifetime sparsity of simulated and experimental responses of excitatory neurons, computed for three  
 372 directions of a grating (0, 45, and 90 degrees) and for three movies. See Methods for details on  
 373 computing all values presented.

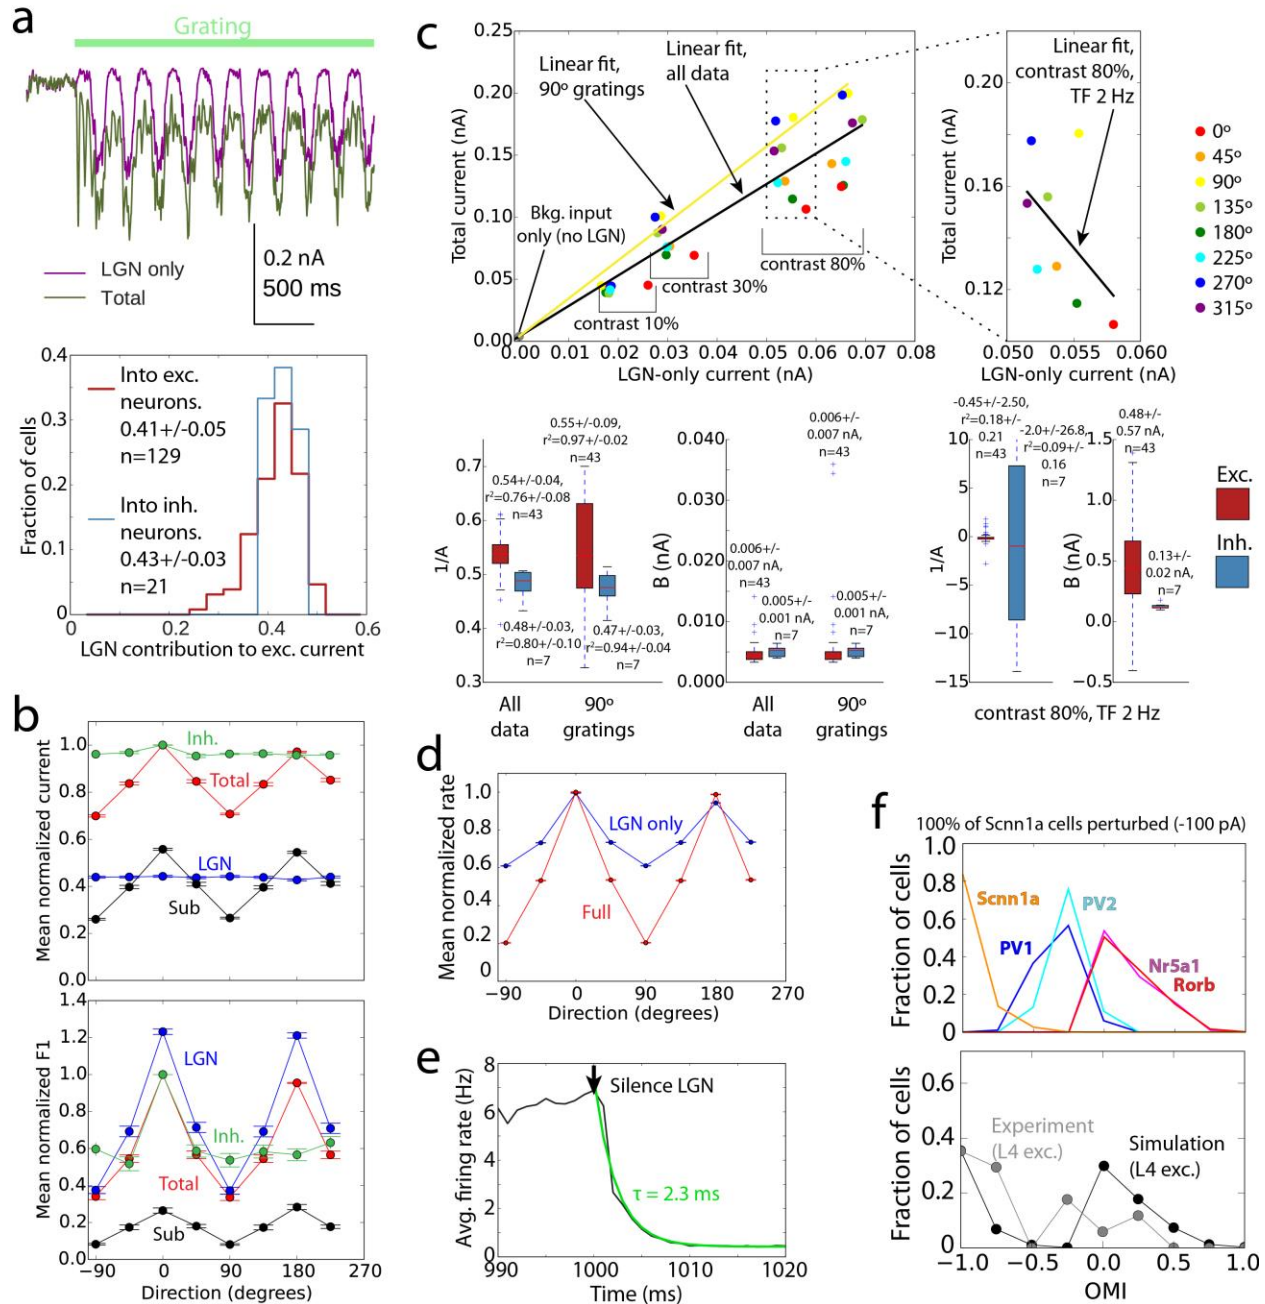

374

375 **Figure 4.** Mechanistic characterization of the model. (a) Cortical amplification of the LGN inputs. The  
 376 excitatory currents (from the LGN only, as well as total) in biophysical cells were measured using voltage  
 377 clamp recordings. Top – an example; bottom – distributions of LGN contribution to the total excitatory  
 378 current across excitatory and inhibitory cells (computed for each cell as the average current over time  
 379 and over all trials of the preferred orientation). (b) Tuning curves for the mean and F1 component of the  
 380 total and LGN-only currents, and their difference (“Sub”, i.e., the cortical component), as well as  
 381 inhibitory current. The data for each cell were normalized to the peak value of the “Total” and shifted  
 382 so that the preferred direction is at 0 degrees; averages and s.e.m. over all recorded excitatory cells are  
 383 shown (TF = 2 Hz, contrast 80%). The inhibitory currents were normalized and aligned to their own peak  
 384 values, since their magnitude is significantly higher than that of excitatory currents. (c) Amplification of

385 excitatory current. Top, the total current vs. the LGN-only current, for an individual Rorb cell (each point  
386 is an average over time and over 10 trials). Linear fits ( $I_{tot} = A I_{LGN} + B$ ) are shown for data  
387 aggregated from all grating directions, TFs, and contrasts (black), for one selected direction (yellow), and  
388 for a fixed contrast and TF (i.e., representing a sample direction tuning curve; right plot). Bottom,  
389 summary of linear fits across all cells analyzed. (d) Tuning curves for mean firing rate in full network  
390 simulations ("Full", red) and in simulations where all connections except the feedforward connections  
391 from the LGN were removed ("LGN only", blue). The data for each cell were normalized to the peak  
392 value of the "Full" and shifted so that the preferred direction is at 0 degrees; averages and s.e.m. over  
393 all excitatory cells are shown (TF = 2 Hz, contrast 80%). (e) Simulations of responses to a drifting grating,  
394 with the LGN activity switched off at 1000 ms. The black curve is the firing rate averaged over all cells,  
395 models, and trials; green is the exponential fit. (f) Distribution of the optogenetic modulation index  
396 (OMI) by cell type in responses to gratings, for simulations of optogenetic silencing of the Scnn1a  
397 population (top). Combined distribution for all biophysical excitatory cells is compared to the  
398 experimental result (bottom).

399

## 400 Mechanisms underlying neural activity and computation in the L4 circuit

401 We further used the model to shed light on the mechanisms that determine patterns of neural activity  
402 and computations performed by the L4 circuit. One important question is to what extent the L4 activity  
403 and computations are inherited from the input regions (here, LGN) vs. being shaped by intrinsic,  
404 recurrent connectivity (see, e.g., [51]). To investigate this, in addition to regular (“Full”) simulations, we  
405 performed a number of simulations where recurrent and background connections were removed, so  
406 that neurons received LGN inputs only (“LGN only”). Using *in silico* voltage clamp (see Methods), we  
407 measured (**Fig. 4a**) synaptic excitatory currents at cells’ somata – from the LGN only,  $I_{LGN}$ , and the total,  
408  $I_{tot}$  – and found that, for preferred directions of 2 Hz drifting gratings, the fraction of  $I_{tot}$  contributed by  
409  $I_{LGN}$  was  $0.41 \pm 0.05$  for excitatory cells, in good agreement with experiment ( $0.36 \pm 0.02$  [17]). Also in  
410 agreement with experiment [17], the mean  $I_{LGN}$  was untuned, since individual LGN filters were mostly  
411 untuned [17] (but see [19, 20]), whereas mean  $I_{tot}$  and  $I_{sub} = I_{tot} - I_{LGN}$  (i.e., the current due to  
412 recurrent connections) were well tuned to the grating orientation (**Fig. 4b**), and F1 components (i.e., the  
413 amplitude of the mode at the stimulus frequency; see Methods) of all of these currents were tuned.  
414 Besides these features that were consistent with experimental recordings [17], one distinction was  
415 observed: the F1 component of  $I_{sub}$  was substantially smaller than that of  $I_{LGN}$  or  $I_{tot}$  (**Fig. 4b**) and the  
416 temporal dynamics of  $I_{sub}$  was in antiphase with that of  $I_{LGN}$  (**Fig. S6a**). This turned out to be a space  
417 clamp artefact, where a stronger  $I_{LGN}$  current increases the membrane voltage at the synapses,  
418 resulting in weaker driving force for recurrent excitation and, therefore, antiphase relationship of  $I_{LGN}$   
419 and  $I_{sub}$ ; simulations where LGN current was removed from the recorded cells exhibited  $I_{sub}$  with no  
420 oscillations at the grating frequency (**Fig. S6a**). Thus, the overall picture was that the  $I_{LGN}$  mean was  
421 untuned whereas its F1 component was; the recurrent connections added current that was tuned  
422 overall, but was not time-modulated (whereas in the experiment [17] it is time-modulated); and the  
423 resulting total current was tuned in both mean and F1. The inhibitory currents were mostly untuned at  
424 the level of both the mean and F1 (**Fig. 4b**); the F1 did show a preference to orientation, but its  
425 magnitude was only a few percent of the mean and the current was not strongly modulated in time (**Fig.**  
426 **S6a**).

427 Comparing mean  $I_{tot}$  and  $I_{LGN}$  of individual cells (**Fig. 4c**) for all grating conditions (i.e., not only the  
428 preferred one shown in **Fig. 4a**) and different contrasts, we observed a complex dependence. The  
429 relationship of  $I_{tot}$  with  $I_{LGN}$  was essentially linear along the contrast dimension (the quality of the  
430 linear fit,

431

$$432 I_{tot} = A I_{LGN} + B,$$

433

434 was  $r^2=76\%$  for excitatory cells for all conditions, and  $97\%$  for a specific grating direction), consistent  
435 with the prediction of an earlier, much simpler self-consistent model [51], but highly non-linear for the  
436 orientation dimension ( $r^2=18\%$ ). The latter was the consequence of the mean of  $I_{LGN}$  being untuned to  
437 orientation, whereas the tuned current from recurrent connections made the mean of  $I_{tot}$  highly tuned  
438 (**Fig. 4b**). Due to the same reason, the amplification factor  $A$  was approximately 2 across all conditions  
439 (since  $B$  was very small on average,  $A$  can be thought of as the inverse of the LGN contribution



440 described above; across all conditions  $1/A = 0.54 \pm 0.04$ , **Fig. 4c**), whereas for the preferred orientation  
441 it was  $1/0.41 = 2.44$  (as the LGN contribution at the preferred orientation was  $0.41 \pm 0.05$ , **Fig. 4a**).

442 How do these relationships between currents shape the properties of the spiking output? We found  
443 that the OSI in L4 at the level of spikes was inherited from the combined LGN inputs to each cell [17],  
444 producing weakly selective output, and was strongly increased by recurrent connections (**Figs. 4d, S6b**).  
445 Generally, the relationship between the rates in Full and LGN only simulations (**Fig. S6c**) was not close to  
446 linear (attempting a linear fit

447

$$448 \quad f_{Full} = A_f f_{LGN} + B_f,$$

449

450 where  $f_{Full}$  and  $f_{LGN}$  are the firing rates in Full and LGN only simulations, and the parameters  $A_f$  and  
451  $B_f$  are marked with the subscript “ $f$ ” to distinguish them from the parameters of linear fit of currents  
452 above, we found  $r^2 = 50\%$  for all conditions and  $65\%$  for one grating direction for excitatory cells). The  
453 firing rates at fixed contrast and TF exhibited a much more linear relationship ( $r^2 = 88\%$ ), but only locally –  
454 the good linear fit required negative values of parameter  $B_f$  ( $-4 \pm 3$  Hz on average), which is non-  
455 physiological given that  $B_f$  is the firing rate of the cell under the conditions when the firing rate induced  
456 by the LGN-only input is zero. Thus, overall the relationship was non-linear, but close to linear past the  
457 firing threshold for LGN-only inputs. Interestingly, the overall effect of recurrent connections on the  
458 spiking output in our model was that of suppression, as the Full-network firing rates at non-preferred  
459 orientations tended to be smaller than LGN-only rates (**Fig. 4d** and **Fig. S6c**, top right), and only at the  
460 preferred orientations Full-network firing reached the same rates as in the LGN-only case.  
461 Consequently,  $R_{max}$  values were approximately the same in the Full and LGN-only cases (**Fig. S6b**).

462 To investigate the L4 circuit mechanisms further, we performed *in silico* optogenetic silencing of LGN  
463 inputs and of a subset of the circuit (see Methods). Despite the significant recurrent amplification, L4  
464 activity shut down rapidly when the LGN spiking was silenced (**Fig. 4e**), in agreement with an analogous  
465 experiment [18]. Although the time course of activity decay was faster in the model (2.3 vs.  $9 \pm 2$  ms,  
466 likely due to the absence of excitatory stimulation from other cortical regions), otherwise the effect of  
467 LGN silencing was the same. The widespread and powerful intracortical inhibition appears to be the  
468 most plausible driving force behind this effect. We then separately silenced the Scnn1a population of  
469 excitatory cells in simulations and conducted analogous experiments *in vivo* (using Archaeorhodopsin-  
470 mediated silencing on randomly selected trials during presentation of TF = 2 Hz drifting gratings, while  
471 extracellular multielectrode recordings were performed, see Methods). Results were characterized by  
472 converting firing rates with ( $f_p$ ) and without ( $f_{control}$ ) perturbation to the optogenetic modulation index  
473 (OMI),

$$474 \quad OMI = \frac{f_p - f_{control}}{f_p + f_{control}}$$

475 Simulations qualitatively agreed with experiment (**Figs. 4f, S7a, b**) in terms of the OMI distribution over  
476 L4 excitatory cells (few inhibitory cells were recorded experimentally), which was approximately  
477 bimodal, with one “lobe” concentrated close to -1 (totally silenced neurons) and the other near 0 (weak

478 or no effect). Due to challenges of recording from the thin layer 4, a small number of cells was obtained  
479 in the experiment, but they all showed a consistent trend of OMI values belonging to one of these two  
480 lobes (**Fig. S7a**). Whereas weak and/or sparse silencing of Scnn1a cells in simulations did not result in a  
481 two-lobe distribution, a strong and dense silencing did (**Fig. S7c**), consistent with the experimental  
482 perturbation that attempted to silence as many Scnn1a cells as possible. Simulations showed (**Fig. 4f**)  
483 that the left lobe in the OMI distribution was due to near-complete silencing of Scnn1a cells. This  
484 silencing reduced the amount of excitation in the network and resulted in moderate decrease of firing of  
485 inhibitory cells. The net effect is that the firing rates of the other excitatory cell types (Rorb and Nr5a1)  
486 remained almost unaffected – yielding the OMI lobe with values close to zero.

487

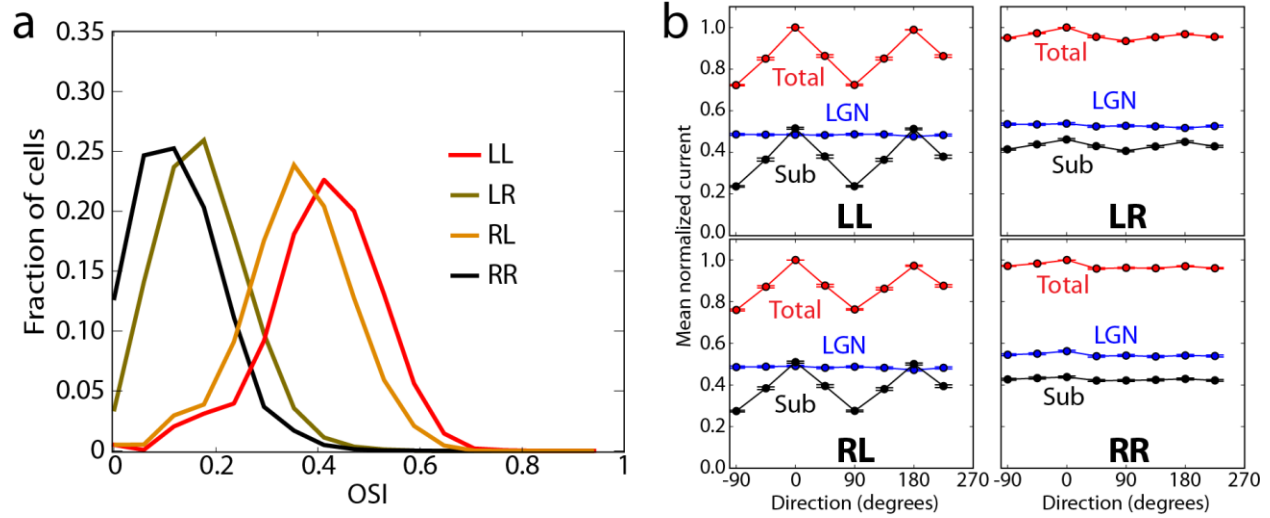

488

489 **Figure 5.** Like-to-like vs. random connectivity and synaptic weights. (a) Distribution of OSI for  
490 biophysical excitatory cells for the LL, RL, LR, and RR cases. (b) Tuning curves for the mean total and  
491 LGN-only currents, and their difference (“Sub”, i.e., the cortical component). The data for each cell were  
492 normalized to the peak value of the “Total” and shifted so that the preferred direction is at 0 degrees;  
493 averages and s.e.m. over all recorded excitatory cells are shown (TF = 2 Hz, contrast 80%).

494

495 Finally, we investigated the effect of the logics of connections between L4 excitatory cells on the neural  
496 activity and computation. In our regular models, a “like-to-like” (“L”) rule [25, 26, 24, 29] was used for  
497 both the connectivity and synaptic weights of excitatory-to-excitatory connections, based on the  
498 anticipated orientation tuning of the cells (**Fig. 1c-e**); because the rule applied to both synaptic  
499 connectivity and amplitude distributions, we refer to this set as “LL”. We then studied three alternative  
500 sets of models. In one, both the connectivity and weights were randomly (“R”) assigned independently  
501 of cell tuning (“RR”). The remaining two sets had the random rule applied to connectivity and like-to-  
502 like to weights (“RL”), or vice versa (“LR”). Each set consisted of 3 models. Besides the “R” or “L” rules,  
503 everything else was exactly the same between the four sets, including the probabilistic distance-  
504 dependent connectivity (**Fig. 1c**).

505 Synaptic weights for all models were tuned following the same procedure (tuning only involved scaling  
506 of weights uniformly across population, thus not affecting the “L” vs. “R” property, which applies to  
507 individual cell pairs), resulting in similar levels of activity for training stimulus (grating) in all models. We  
508 then assessed how functional properties differed. We found that OSIs were extremely reduced in the  
509 RR set, with LR being only slightly better tuned, whereas RL came close to the original well-tuned LL set  
510 (**Fig. 5a**). Because the mean LGN current was untuned in all models, the critical amplification of  
511 orientation selectivity (**Fig. 4b-d**) came from the lateral L4 connections, which were well tuned in LL and  
512 RL sets and poorly tuned in LR and RR sets (**Fig. 5b**). As a result, the total current as well as spiking  
513 output was well tuned in LL and RL sets and barely tuned in LR and RR (**Fig. 5**). This suggests a bigger  
514 role of synaptic weights than connection probability in shaping network responses, which can be easily  
515 understood since the “L” rule for weights results in low contributions from non-like-to-like connections,  
516 even if such connections are present, thus effectively enforcing the “L” type connectivity.

517

518

519

520

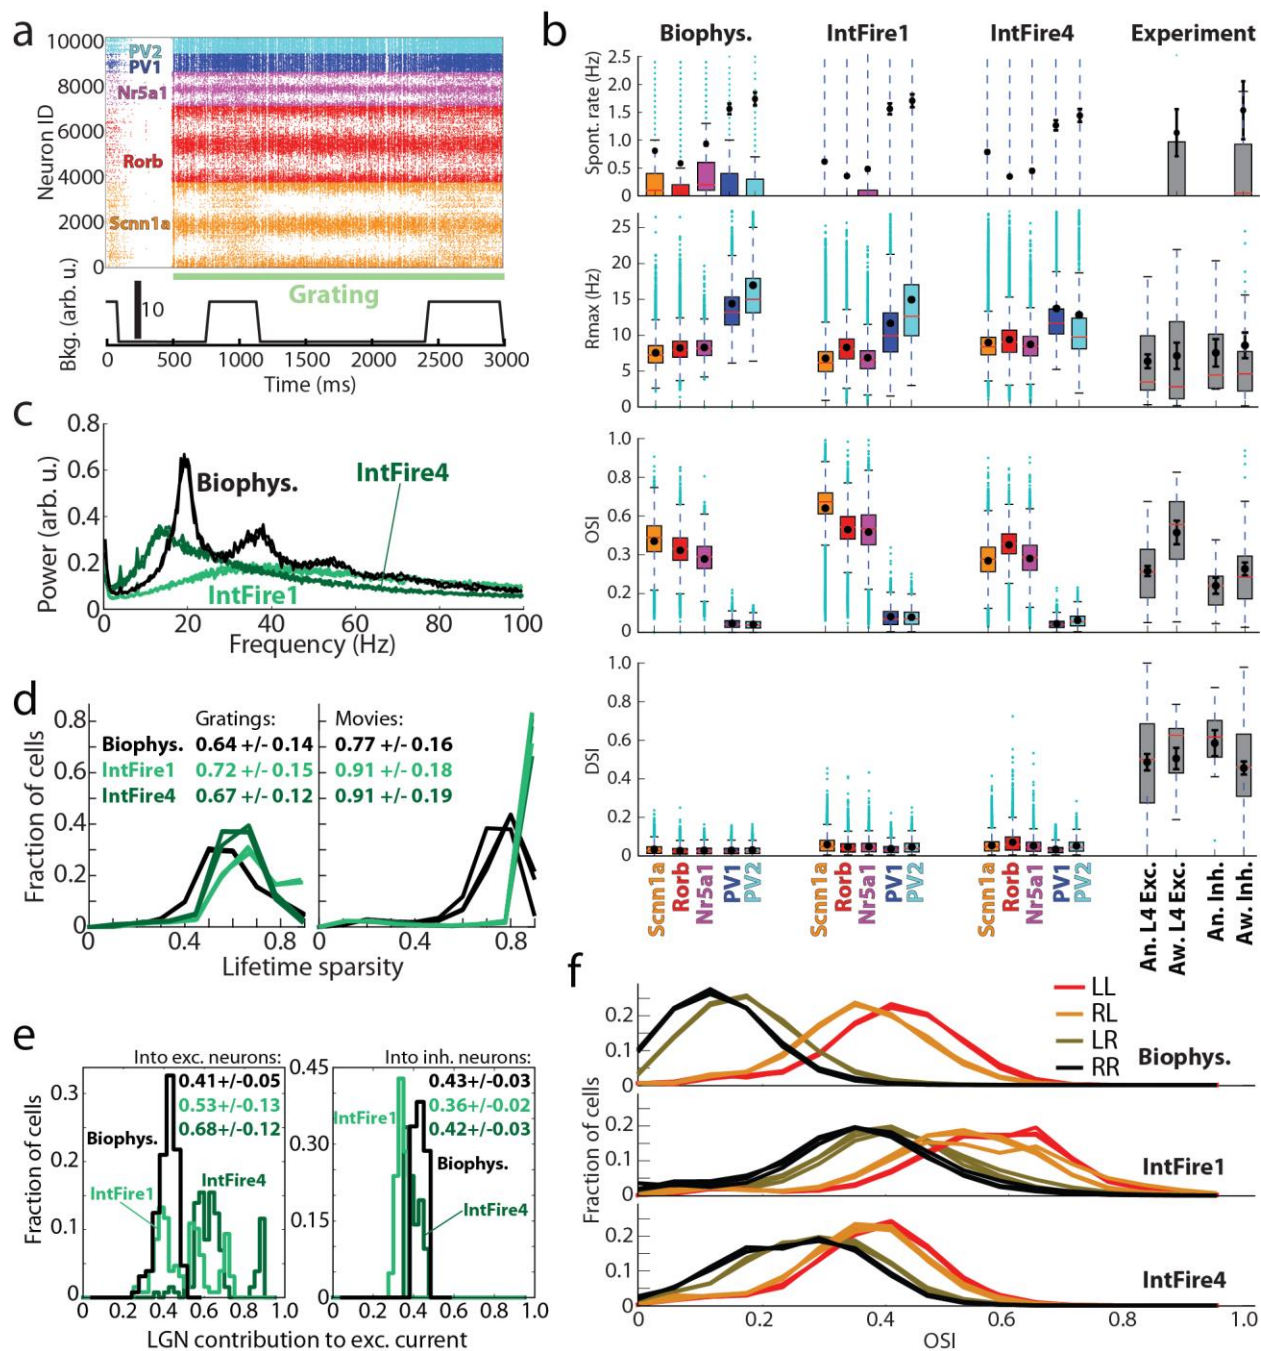

521

522

523 **Figure 6.** Comparison of biophysical and all-LIF simulations employing the IntFire1 or IntFire4 models.  
 524 (a) An example spike raster in response to a drifting grating in an all-LIF IntFire1 simulation. (b)  
 525 Spontaneous rate,  $R_{max}$ , OSI and DSI by cell type. (c) Spectra of multi-unit activity (weighted by  $1/r$ ,  
 526 where  $r$  is the distance from the cell to the center of the system; this is used as a proxy to LFP). (d)  
 527 Distributions of lifetime sparsity of responses to gratings and movies, averaged over 10 trials. The data  
 528 are for three directions of a grating (0, 45, and 90 degrees) and for three movies. (e) Distributions of

529 LGN contribution to the total excitatory synaptic inputs across excitatory and inhibitory cells (in the  
530 IntFire1 and IntFire4 cases, this is computed for each cell as the average synaptic input over time and  
531 over all trials of the preferred orientation; see Methods), for TF = 2 Hz drifting gratings. (f) Distribution  
532 of OSI for excitatory cells for the LL, RL, LR, and RR cases.

533

## 534 Performance of a simplified model

535 How does the ability to reproduce experimental recordings depend on the level of granularity of the  
536 model? To address this question, we built two versions of a radically simplified model, where  
537 biophysical neurons and bi-exponential synapses were replaced by LIF neurons and either instantaneous  
538 “charge-dump” synapses (using NEURON’s IntFire1 function) or synapses with exponential time  
539 dependence of synaptic current (NEURON’s IntFire4 function). These all-LIF models used exactly the  
540 same cell-to-cell connections and inputs as the biophysical models and were optimized using the same  
541 protocol (see Methods).

542 The results of the all-LIF simulations were qualitatively similar to the results of biophysical simulations  
543 (Fig. 6), but specific quantitative distinctions were obvious. Although the overall appearance of  
544 responses (Fig. 6a) and mean values of spontaneous rates and  $R_{max}$  were similar to the biophysical case,  
545 the OSI values were elevated in the IntFire1 case (Fig. 6b). Most noticeable, the gamma oscillation was  
546 largely absent in the IntFire1 models (Fig. 6c). This was likely due to instantaneous synapses in IntFire1,  
547 since gamma oscillations [11, 12, 13, 14, 15] are thought to be strongly dependent on the properties of  
548 inhibitory perisomatic synapses [11, 14], and especially their time constants. Thus, removal of the  
549 appropriate synaptic kinetics from the large and distributed network model like ours may be expected  
550 to disrupt gamma oscillations. By contrast, the IntFire4 model employed a simple form of synaptic  
551 kinetics and produced oscillations in the range of 10-20 Hz, i.e., close to ~20 Hz gamma oscillation in the  
552 biophysical model (Fig. 6c).

553 Further distinctions were observed for sparsity values (Fig. 6d). The overall trend of higher sparsity for  
554 movies than for gratings was reproduced by both all-LIF models, but they both also exhibited higher  
555 sparsity values than the biophysical case and the experiment (Fig. 3f). Perhaps the most significant  
556 difference with the biophysical model was observed for the magnitude of cortical amplification (Fig. 6e)  
557 for excitatory cells (interestingly, inhibitory cells did not show substantial differences). The LGN  
558 contribution was  $0.41 \pm 0.05$  in the biophysical model and  $0.36 \pm 0.02$  in experiment [17], whereas it  
559 was  $0.53 \pm 0.13$  for IntFire1 and even higher,  $0.68 \pm 0.12$ , for the otherwise more realistic IntFire4. The  
560 distributions of amplification values were also quite different in all-LIF models (Fig. 6e), exhibiting  
561 multiple peaks – apparently for the multiple excitatory cell types – instead of a single peak in the  
562 biophysical model. Finally, the functional connectivity had the same consequences in the all-LIF models  
563 as in the biophysical case – the orientation tuning was high for models with the LL or RL rules, and low  
564 for LR and RR (Fig. 6f). On the other hand, the small difference between the LL and RL cases, observed  
565 in the biophysical model, was mostly eliminated, and overall the OSIs were higher for the IntFire1 model  
566 and, in the RR and LR cases, for IntFire4 as well.

567

## 568 DISCUSSION

569 The promise of data-driven neuroscience modeling is in harnessing computing power to establish a  
570 platform for discovery that would work hand-in-hand with experiments. For that promise to  
571 materialize, models need to be biologically realistic in recapitulating knowledge about brain structure as  
572 well as in reproducing *in vivo* activity and computation. Doing either is difficult, and doing both together  
573 is more difficult yet, and has not been widely practiced (though, see, e.g., [2, 3, 4]). We described here a  
574 model of the L4 in mouse V1 that was built using a high degree of biological realism and simulated in a

575 framework of an *in silico* visual physiology experiment. We asked how well the model reproduces  
576 activity observed *in vivo* across a variety of stimuli, which mechanisms underlie the activity and  
577 computation in the modeled L4 circuit, and how the levels of simplification used in the model affect its  
578 performance.

579 Despite the small training set of stimuli for which our model was optimized – a gray screen and a single  
580 grating presentation for 0.5 s – it generalized well to a large test set of stimuli. The model reproduced  
581 major features of *in vivo* observations with respect to, e.g., the magnitude of responses to gratings,  
582 orientation selectivity, prominence of gamma oscillations, long-tailed distributions of firing rates,  
583 lifetime sparsity for gratings and movies, magnitude of cortical amplification, and effect of optogenetic  
584 perturbations of the LGN or the Scnn1a population in L4 (**Figs. 3, 4**). Such an agreement across stimulus  
585 classes and types of observation is remarkable given that, although the model included a significant  
586 degree of biological realism, many simplifications were used: neurons possessed active conductances  
587 only at the soma, the variety of neuron models was limited to five unique single cell morphologies and  
588 sets of membrane conductances, synapses had no short-term plasticity, LGN inputs were simplified,  
589 connectivity was established via simple probabilistic rules, most known interneuron cell types [33] were  
590 absent, and in fact the influence of most of V1 (L1, L2/3, L5, and L6) and the rest of the brain was  
591 reduced to extremely simple background states. This may suggest that many of L4 computations are  
592 produced by its local network, and other layers may play a primarily modulatory role – such as gain  
593 control exerted by L6 [52] – as far as L4 activity is concerned.

594 Perhaps even more instructive than successes, some deficiencies were observed too. In terms of  
595 reproducing *in vivo* activity, the most important issues were the absence of direction selectivity and too  
596 fast responses to full-field flashes (**Fig. 3b,e**). Both appear to be due to the extreme simplicity of the  
597 LGN inputs – in particular, the absence of sustained LGN responses in the model. This provides an  
598 immediate direction for improving the model, especially based on the more recent experimental results  
599 [23], which is the aim of ongoing work on the next model generation.

600  
601 In applying the model to study mechanisms underlying the operation of the L4 circuit (**Figs.4, 5**), we  
602 found the following principles. Tuning in L4 cells arose from combination of convergent LGN inputs, but  
603 to reach physiological levels of selectivity, the functional like-to-like connectivity was essential (**Figs. 4d,**  
604 **S6b, 5**). The effect was especially sensitive to synaptic weights, and less so to connectivity alone (**Fig. 5**),  
605 because like-to-like weights effectively enforce like-to-like connectivity by scaling down contributions  
606 from non-like-to-like connections. These results suggest that like-to-like rules, experimentally observed  
607 in L2/3 [25, 26, 24, 29], are likely to be found in L4 as well, and may play an essential role in determining  
608 functional information processing in the cortex.

609 The amplification of excitatory current in excitatory cells due to recurrent connections was by 2-3-fold  
610 (**Fig. 4a, b, c**), in quantitative agreement with experimental measurements [17]. The amplification was  
611 linear [51] along the contrast dimension (possibly, in part due to our LGN filters being linear), but highly  
612 non-linear along the orientation dimension (**Fig. 4c**), since the total current was tuned to orientation,  
613 whereas the LGN current was untuned [17] (**Fig. 4b**). Thus, overall the network amplification was  
614 extensive and non-linear both at the level of currents and at the level of spiking output (**Fig. S6c**).  
615 Despite such strong excitatory amplification, the whole circuit was controlled by even stronger  
616 inhibition, which readily shut down the activity in the absence of the LGN input [18] (**Fig. 4e**).  
617 Optogenetic suppression of a subpopulation of excitatory L4 neurons (Scnn1a) resulted in a clearly



618 bimodal distribution of firing rate changes both in simulation and in experiment (**Fig. 4f**), demonstrating  
619 a compensatory effect in the circuit, where only the directly targeted Scnn1a cells were shut down,  
620 whereas other cells approximately maintained their activity levels.

621 In terms of the mechanistic characterization of the circuit, another important insight again follows from  
622 the model deficiency: we observed that the cortical component of the excitatory current (“Sub”) into  
623 excitatory neurons was tuned to orientation, but poorly modulated in time (**Figs. 4b, S6a**), whereas in  
624 the experiment it was strongly modulated at the grating frequency and closely matched the phase of the  
625 LGN input [17]. In the model, this “Sub” component is tuned because of the like-to-like connectivity  
626 rule, where cells receiving similarly oriented LGN inputs have higher connection probability and stronger  
627 synapses. However, this rule does not take phase into account, and therefore, for a given target cell, all  
628 source cells have different phases, explaining why the “Sub” current was not modulated at the grating  
629 frequency. The fact that in the experiment “Sub” current is modulated and is in phase with the LGN  
630 current indicates that the like-to-like connectivity is more sophisticated and includes also the phase  
631 information [17]. This is consistent with reports in the literature [25, 24] that similarity in orientation  
632 preference is a good but not the best predictor of connectivity and with theoretical ideas (e.g., [28]) that  
633 lateral connections in the cortex are optimized to enhance features, such as extended lines in V1.

634 A further simplification of our network model, replacing all biophysical neurons by LIF units, preserved  
635 most general trends in features of neuronal activity, but the quantitative agreement with experiment  
636 suffered. The levels of orientation selectivity and sparsity of responses were altered (**Fig. 6b, d, f**). The  
637 oscillations at the level of population activity were eliminated when instantaneous synaptic kinetics was  
638 used and partially rescued with non-instantaneous synapses (**Fig. 6c**). Although further exploration is  
639 necessary to find out how one can match the oscillations spectrum of the biophysical model with a  
640 simpler network model, this result supports the idea that synaptic kinetics is important for generating  
641 oscillations in the relevant regime (e.g., [11, 14]). Perhaps the most substantial difference with the  
642 biophysical model was that the cortical amplification was not captured well by all-LIF models (**Fig. 6e**),  
643 hinting that mechanisms shaping activity and computation in the L4 circuit may not be well represented  
644 by these simpler models. Clearly, many modifications of the simpler models are possible that may  
645 improve performance, and our results do not rule out that point-neuron simulations can be adequate  
646 for studying cortical activity and function – in fact, our results are promising since many of the trends of  
647 activity were reproduced qualitatively. But, they do suggest that careful characterization of the level of  
648 representation used for modeling may be important and that biological detail may matter for faithful  
649 representation of a variety of observables.

650 Overall, results reported here are encouraging in that, despite significant simplifications, many aspects  
651 of activity and computation in the L4 circuit were captured by a data-driven model constructed in a  
652 bottom-up fashion. We suggest that systematic data-driven modeling oriented towards mimicking *in*  
653 *vivo* physiology experiments will be an important approach to take advantage of the modern large-scale  
654 data collection efforts. Our software code, the model, and simulation results are made publicly  
655 available (see SI) to enable further efforts in modeling *in vivo* activity and function.

656

657 **DATA AVAILABILITY**

658 Data generated or analyzed during this study are included in this published article in its supplementary  
659 files; as specified in the SI, larger volumes of the data are made available online, and additional raw data  
660 is available on request (per cost for data medium and shipping). Modeling and analysis also involved  
661 data that are already publicly available (Allen Brain Observatory [53] and Allen Cell Types Database [31]).

662

## 663 **CODE AVAILABILITY**

664 The software code used to build models, perform simulations, and perform analysis is included in this  
665 published article in its supplementary files.

666

## 667 **AUTHOR CONTRIBUTIONS**

668 A.A. and C.K. designed the overall study. J.B., N.dC., S.dV., D.D., S.D., N.W.G., R.I., T.J., J.L., B.L., S.M.,  
669 S.R.O., R.C.R., G.S.-L., S.A.S., M.S., Q.W., and J.W. contributed to the design of models and simulations,  
670 supplied data, and provided crucial advice. A.A., Y.N.B., N.C., D.F., N.W.G., S.G., R.I., Z.W., and Z.X.  
671 developed modeling software, built models, and carried out simulations. N.dC., D.D., S.D., L.L., and  
672 S.R.O. performed experiments. A.A., Y.N.B., M.B., N.dC., D.D., S.D., N.W.G., S.G., R.I., G.K.O., S.R.O.,  
673 Z.W., and Z.X. analyzed the data. A.A. and C.K. wrote the manuscript with comments from all authors.

674

## 675 **ACKNOWLEDGEMENTS**

676 We are grateful to Gabe J. Murphy for helpful discussions. We thank the Allen Institute founders, Paul  
677 G. Allen and Jody Allen, for their vision, encouragement and support.

678

## 679 **References**

- 680 [1] California Institute of Technology. Caltech Library Archives [Internet]. Available from:  
681 <http://archives-dc.library.caltech.edu/islandora/object/ct1:483>
- 682 [2] Markram, H. et al. Reconstruction and Simulation of Neocortical Microcircuitry. *Cell* **163**, 456-492  
683 (2015).
- 684 [3] Traub, R.D. et al. Single-column thalamocortical network model exhibiting gamma oscillations, sleep  
685 spindles, and epileptogenic bursts. *J. Neurophysiol.* **93**, 2194-2232 (2005).
- 686 [4] Zhu W, Shelley M, and Shapley R. A neuronal network model of primary visual cortex explains spatial  
687 frequency selectivity. *J. Comput. Neurosci.* **26**, 271 – 287 (2009).
- 688 [5] Buzsaki, G., and Mizuseki, K. The log-dynamic brain: how skewed distributions affect network  
689 operations. *Nat Rev Neurosci.* **15**, 264–278 (2014).
- 690 [6] Niell CM, Stryker MP. Highly selective receptive fields in mouse visual cortex. *J Neurosci* **28**, 7520–  
691 7536 (2008).

- 692 [7] Durand, S. et al. A comparison of visual response properties in the lateral geniculate nucleus and  
693 primary visual cortex of awake and anesthetized mice. *J Neurosci* **36**, 12144–12156 (2016).
- 694 [8] Li, Y. et al. Broadening of Inhibitory Tuning Underlies Contrast-Dependent Sharpening of Orientation  
695 Selectivity in Mouse Visual Cortex. *J. Neurosci.* **32**, 16466-16477 (2012).
- 696 [9] Finn, I.M., Priebe, N.J., and Ferster, D. The emergence of contrast-invariant orientation tuning in  
697 simple cells of cat visual cortex. *Neuron* **54**, 137 – 152 (2007).
- 698 [10] Welle CG and Contreras D. Sensory-driven and spontaneous gamma oscillations engage distinct  
699 cortical circuitry. *J. Neurophysiol.* **115**, 1821-1835 (2016).
- 700 [11] Brunel, N., and Wang, X.-J. What Determines the Frequency of Fast Network Oscillations with  
701 Irregular Neural Discharges? *J. Neurophysiol.* **90**, 415–430 (2003).
- 702 [12] Borgers, C., and Kopell, N. Synchronization in Networks of Excitatory and Inhibitory Neurons with  
703 Sparse, Random Connectivity. *Neural Computation* **15**, 509–538 (2003).
- 704 [13] Tiesinga, P, and Sejnowski TJ. Cortical enlightenment: are attentional gamma oscillations driven by  
705 ING or PING? *Neuron* **63**, 727-732 (2009).
- 706 [14] Buzsaki, G., and Wang, X.-J. Mechanisms of gamma oscillations. *Annu Rev Neurosci.* **35**, 203-225  
707 (2012).
- 708 [15] Bos, H., Diesmann, M., and Helias, M. Identifying Anatomical Origins of Coexisting Oscillations in  
709 the Cortical Microcircuit. *PLoS Comput Biol.* **12**, e1005132 (2016).
- 710 [16] Froudarakis, E. et al. Population code in mouse V1 facilitates readout of natural scenes through  
711 increased sparseness. *Nat. Neurosci.* **17**, 851-857 (2014).
- 712 [17] Lien AD, Scanziani M. Tuned thalamic excitation is amplified by visual cortical circuits. *Nat Neurosci*  
713 **16**, 1315–1323 (2013).
- 714 [18] Reinhold, K., Lien, A.D., and Scanziani, M. Distinct recurrent versus afferent dynamics in cortical  
715 visual processing. *Nature Neurosci.* **18**, 1789–1797 (2015).
- 716 [19] Kondo, S, and Ohki, K. Laminar differences in the orientation selectivity of geniculate afferents in  
717 mouse primary visual cortex. *Nat Neurosci.* **19**, 316-319 (2016).
- 718 [20] Sun, W., et al. Thalamus provides layer 4 of primary visual cortex with orientation- and direction-  
719 tuned inputs. *Nature Neurosci.* **19**, 308–315, (2016).
- 720 [21] Li, Y. et al. Linear Transformation of Thalamocortical input by Intracortical Excitation. *Nat Neurosci.*  
721 **16**, 1324–1330 (2013).
- 722 [22] Morgenstern, N.A., Bourg, J., and Petreanu, L. Multilaminar networks of cortical neurons integrate  
723 common inputs from sensory thalamus. *Nature Neurosci.* **19**, 1034–1040 (2016).
- 724 [23] Lien, A.D., and Scanziani, M. Emergence of Direction Selectivity at the Convergence of Thalamo-  
725 Cortical Synapses in Visual Cortex. *bioRxiv*, 244293. DOI 10.1101/244293.

- 726 [24] Ko, H. et al. Functional specificity of local synaptic connections in neocortical networks. *Nature*  
727 **473**, 87-91 (2011).
- 728 [25] Cossell L. et al. Functional organization of excitatory synaptic strength in primary visual cortex.  
729 *Nature* **518**: 399-403 (2015).
- 730 [26] Lee, W.C. et al. Anatomy and function of an excitatory network in the visual cortex. *Nature* **532**:  
731 370-374 (2016).
- 732 [27] Yoshimura, Y., Dantzker, J.L.M., and Callaway, E.M. Excitatory cortical neurons form fine-scale  
733 functional networks. *Nature* **433**, 868-873 (2005).
- 734 [28] Iyer, R. and Mihalas, S. Cortical circuits implement optimal context integration. *bioRxiv*, 158360.  
735 DOI 10.1101/158360 (2017).
- 736 [29] Wertz, A., Trenholm, S., Yonehara, K., Hillier, D., Raics, Z., Leinweber, M., Szalay, G., Ghanem, A.,  
737 Keller, G., Rózsa, B., Conzelmann, K.-K., and Roska, B. Single-cell-initiated monosynaptic tracing reveals  
738 layer-specific cortical network modules. *Science* **349**, 70-74 (2015).
- 739 [30] Gouwens, N. W. et al. Systematic generation of biophysically detailed models for diverse cortical  
740 neuron types. *Nature Communications* **9**, 710 (2018).
- 741 [31] Allen Institute for Brain Science. Allen Cell Types Database [Internet]. Available from:  
742 <http://celltypes.brain-map.org>.
- 743 [32] Braitenberg, V. and Schuz, A. *Cortex: Statistics and Geometry of Neuronal Connectivity*. Berlin:  
744 Springer (1998).
- 745 [33] Tremblay, R., Lee, S., and Rudy, B. GABAergic Interneurons in the Neocortex: From Cellular  
746 Properties to Circuits, *Neuron* **91**, 260-292 (2016).
- 747 [34] Hines ML, Carnevale NT. The NEURON simulation environment. *Neural Comput.* **9**, 1179–1209  
748 (1997).
- 749 [35] Gratiy, S. et al. BioNet: a Python interface to NEURON for modeling large-scale networks.  
750 *Submitted*. Package available from: <https://alleninstitute.github.io/bmtk/bionet.html>.
- 751 [36] Perin R, Berger TK, Markram H. A synaptic organizing principle for cortical neuronal groups. *Proc*  
752 *Natl Acad Sci USA* **108**, 5419–5424 (2011).
- 753 [37] Troyer, T.W., Krukowski, A., Priebe, N.J., Miller, K.D. Contrast-invariant orientation tuning in cat  
754 visual cortex: Feedforward tuning and correlation-based intracortical connectivity. *J. Neurosci.* **18**, 5908–  
755 5927 (1998).
- 756 [38] Krukowski, A.E. and Miller, K.D. Thalamocortical NMDA Conductances and Intracortical Inhibition  
757 Can Explain Cortical Temporal Tuning. *Nature Neurosci.*, **4**, 424-430 (2001).
- 758 [39] Bopp, R., et al. An Ultrastructural Study of the Thalamic Input to Layer 4 of Primary Motor and  
759 Primary Somatosensory Cortex in the Mouse. *J. Neurosci.* **37**, 2435-2448 (2017).

- 760 [40] Binzegger, T., Douglas R.J., and Martin K.A. A quantitative map of the circuit of cat primary visual  
761 cortex. *J. Neurosci.* **29**, 8441-53 (2004).
- 762 [41] Sato, TK, Nauhaus, I, Carandini, M. Traveling waves in visual cortex. *Neuron* **75**, 218-229 (2012).
- 763 [42] Tan, AY, et al. Sensory stimulation shifts visual cortex from synchronous to asynchronous states.  
764 *Nature* **509**, 226-229 (2014).
- 765 [43] McGinley, MJ, et al. Waking State: Rapid Variations Modulate Neural and Behavioral Responses.  
766 *Neuron* **87**, 1143-1161 (2015).
- 767 [44] Harris, K.D., and Thiele, A. Cortical state and attention. *Nature Reviews Neurosci.* **12**, 509-523  
768 (2011).
- 769 [45] Wu L-J, Li X, Chen T, Ren M, Zhuo M, Characterization of intracortical synaptic connections in the  
770 mouse anterior cingulate cortex using dual patch clamp recording. *Mol Brain* **2**, 32 (2009).
- 771 [46] Prinz, A. A., Bucher, D., and Marder, E. Similar network activity from disparate circuit parameters.  
772 *Nature Neurosci.* **7**, 1345-1352 (2004).
- 773 [47] Lefort, S., Tomm, C., Floyd Sarria, J.-C., and Petersen, C.C.H. The Excitatory Neuronal Network of  
774 the C2 Barrel Column in Mouse Primary Somatosensory Cortex. *Neuron* **61**, 301–316 (2009).
- 775 [48] Tucker, T.R. and Fitzpatrick, D. Luminance-Evoked Inhibition in Primary Visual Cortex: A Transient  
776 Veto of Simultaneous and Ongoing Response. *J. Neurosci.* **26**, 13537-13547 (2006).
- 777 [49] Macknik, S. L. and Martinez-Conde, S. The spatial and temporal effects of lateral inhibitory  
778 networks and their relevance to the visibility of spatiotemporal edges. *Neurocomputing* **58-60**, 775–782  
779 (2004).
- 780 [50] Vinje WE and Gallant JL. Natural stimulation of the nonclassical receptive field increases  
781 information transmission efficiency in V1. *J. Neurosci.* **22**, 2904-2915 (2002).
- 782 [51] Douglas, R.J., et al. Recurrent excitation in neocortical circuits. *Science* **269**, 981-985 (1995).
- 783 [52] Olsen, S.R., Bortone, D.S., Adesnik, H., and Scanziani, M. Gain control by layer six in cortical circuits  
784 of vision. *Nature* **483**, 47–52 (2012).
- 785 [53] Allen Institute for Brain Science. Allen Brain Observatory – Visual Coding [Internet]. Available from:  
786 <http://observatory.brain-map.org/visualcoding/>.
- 787
- 788
- 789

## 790 **METHODS**

791

### 792 ***Model building and simulation details***

793 All simulations were performed with the parallelized code (available in *Supplementary Files*) written in  
794 python 2.7 and employing NEURON 7.4 [34] as a simulation engine. Simulations were carried out  
795 typically on 120 CPU cores (Intel Xeon CPU E5-2620 v2, 2.10GHz; 128 GB RAM per a 24-core node),  
796 requiring ~1 hour to simulate 1 s.

797

### 798 ***Network Composition***

799 The network model was constructed from five biophysically detailed models of individual neurons [30]  
800 from an early version of the Allen Cell Types Database [31], and two models of leaky-integrate-and-fire  
801 (LIF) neurons (one for excitatory type and one for inhibitory type). The biophysical models employed  
802 passive conductances in the dendrites and 10 active conductances in the soma, including Na<sup>+</sup>, K<sup>+</sup>, and  
803 Ca<sup>2+</sup> conductances, as described in detail in [30]. The five models represented three types of excitatory  
804 L4 neurons (expressing the genes Scnn1a, Rorb, and Nr5a1) and two types of fast-spiking parvalbumin-  
805 expressing (PV) interneurons. Cells expressing these markers comprise the majority of neurons in L4 of  
806 V1. These models consisted of 264 (Scnn1a), 141 (Rorb), 101 (Nr5a1), 121 (PV1), and 91 (PV2)  
807 compartments. The LIF neuron models were implemented using the IntFire1() function of NEURON,  
808 which contains two parameters – the time constant and the refractory period. The former was set to  
809 the average time constant from the corresponding biophysical models (from Scnn1a, Rorb, and Nr5a1  
810 for the excitatory LIF neuron and PV1 and PV2 for the inhibitory LIF neuron); the latter was 3 ms for both  
811 LIF models. All the models are available in the *Supplementary Files* (see SI).

812 The 45,000 cells in the network model were distributed as follows: 3700 for Scnn1a, 3300 for Rorb, 1500  
813 for Nr5a1, 800 for PV1, 700 for PV2, 29750 for excitatory LIF, and 5250 for inhibitory LIF. The cells were  
814 distributed in a cylinder 100 μm in height; the biophysical cells occupied the inner core with the 400 μm  
815 radius, and the LIF cells, the outer shell with the radii from 400 μm to 845 μm.

816 Three independent models were generated using different random seeds. These three models were  
817 used for each connectivity case (LL, LR, RL, and RR, see Main Text). For each model, the recurrent  
818 connectivity and synaptic weights (see below) differed across the LL, LR, RL, and RR cases, since different  
819 connectivity/weight rules were applied; everything else was identical across these four cases.

820

### 821 ***Connectivity within the Network***

822 For the purposes of establishing recurrent connections, all neurons were considered to belong to two  
823 groups – excitatory (E; Scnn1a, Rorb, Nr5a1, and excitatory LIF) and inhibitory (I; PV1, PV2, and  
824 inhibitory LIF). Four types of connections were established: E-to-E, E-to-I, I-to-E, and I-to-I. The  
825 probability of connection was chosen as a product of a function dependent on the distance between the  
826 somata of the two cells and the function dependent on the difference of the assigned preferred  
827 orientation angle (see **Fig. 1**). The latter function was constant, 1.0, for E-to-I, I-to-E, and I-to-I, whereas

828 for E-to-E it differed depending on the model we assumed. The models with like-to-like connection  
829 probability (LL and LR, see Main text) employed a linear function, starting at 1 for the zero difference in  
830 the preferred orientation angle, and equal to 0.5 at 90 degrees difference; for the models with random  
831 connection probability (RL and RR), the function was set to one. The distance dependent function was  
832 linear, with the peak at zero distance (0.34 for E-to-E and 0.26 for E-to-I in the case of LL and LR models;  
833 0.255 for both E-to-E and E-to-I in the case of RL and RR models; and 1.0 for I-to-E and I-to-I in all cases).  
834 The linear decay was determined by the distance at which the function became zero (300  $\mu\text{m}$  for E-to-E  
835 and E-to-I, and 160  $\mu\text{m}$  for I-to-E and I-to-I). For established connections, the number of synapses was  
836 selected randomly with uniform probability between 3 and 7.

837 The numbers of synapses from different sources per neuron are not well established for the mouse  
838 visual cortex, but are known approximately for cat [40], where, for the L4 excitatory cells (spiny stellate  
839 cells projecting to L2/3 or L4, and for pyramidal cells), the number of incoming synapses is  $\sim 5,000$ - $7,000$ .  
840 Out of those, e.g., for pyramidal cells,  $\sim 1,100$  synapses come from L4 excitatory cells,  $\sim 2,550$  from  
841 excitatory cells in other layers, and  $\sim 2,000$  are excitatory with unassigned source. Assuming the same  
842 distribution of sources for unassigned synapses, one can expect that  $\sim 1,700$  excitatory synapses are  
843 from L4 sources. Note that the number of synapses from LGN is  $\sim 100$ - $150$  in the cat cortex. Converting  
844 these numbers to fractions, one finds that  $\sim 25$ - $30\%$  of all synapses are from the L4 excitatory sources,  
845  $55$ - $60\%$  from other excitatory sources, and  $15$ - $20\%$  from inhibitory sources. For the inhibitory cells in L4,  
846 the fractions are similar, but the total number of synapses is smaller ( $\sim 3,250$  synapses for basket cells).

847 We assumed similar fractions for the mouse visual cortex, except the number of synapses from the LGN,  
848 for which we experimentally found a much larger number,  $\sim 1,000$  per cell (see Main Text). Assuming  
849 somewhat smaller number of synapses for mouse cells than for cat cells, we posited (**Table 1**) for the  
850 purposes of our model that pyramidal cells in L4 of V1 receive  $\sim 6,000$  synapses total, with  $\sim 1,000$  ( $17\%$ )  
851 coming from LGN,  $\sim 2,000$  ( $\sim 33\%$ ) from L4 excitatory sources, and  $\sim 400$  ( $\sim 7\%$ ) from L4 PV<sup>+</sup> inhibitory  
852 sources. The rest was not modeled explicitly (except for the background, see Main Text and below), as it  
853 comes from other L4 inhibitory sources (PV<sup>-</sup> interneurons – presumably, another  $7\%$ , i.e.,  $\sim 400$  synapses)  
854 and from excitatory sources from other layers and brain regions ( $\sim 2,200$ , i.e.,  $36\%$ ), both of which were  
855 not represented in the model. For the synapses from the LGN, we did not model explicitly all the LGN  
856 cell types (see below), and thus restricted the number of LGN synapses to  $\sim 600$  out of the expected  
857  $1,000$  total. For simplicity, we assumed numbers for synapses from LGN and L4 neurons to the PV<sup>+</sup> cells  
858 to be similar in our model to the numbers used for pyramidal cells. Due to the randomness of  
859 connections and of the number of synapses per connection, the actual number of synapses from L4  
860 sources for each cell varied within  $\sim 10\%$  from the average (**Fig. S1a**).

861

862 **Table 1.** Assumed average numbers of synapses per an excitatory cell in L4 of mouse V1. See text for  
863 details.

| From LGN | From L4 excitatory cells | From L4 PV <sup>+</sup> interneurons | From L4 PV <sup>-</sup> interneurons | From neurons in other layers and brain regions | Total |
|----------|--------------------------|--------------------------------------|--------------------------------------|------------------------------------------------|-------|
| 1,000    | 2,000                    | 400                                  | 400                                  | 2,200                                          | 6,000 |

864

865 Thus, each cell in our simulations received on average ~3,000 synapses from other excitatory and  
866 inhibitory cells in the L4 model and LGN sources. After building our models, including connectivity, we  
867 found that, for recurrent connections among the L4 cells, excitatory neurons received connections from  
868 490 +/- 20 and sent connections to 480 +/- 20 neurons on average, whereas inhibitory neurons received  
869 connections from 490 +/- 20 and sent connections to 530 +/- 20 neurons on average. In addition, each  
870 cell also received a small number of “background” synapses, as described below.

871 Synapses were distributed on the dendritic trees of the target cells randomly within certain distance  
872 constraints, on the soma, basal, or apical processes, according to the literature (e.g., [32, 33, 40, 54, 55,  
873 56, 57, 58]). Namely, all synapses to PV1 and PV2 cells were distributed on the soma and basal  
874 dendrites without limitations. For Scnn1a, Rorb, and Nr5a1 cells, excitatory synapses from L4 and  
875 background were placed on basal and apical dendrites, 30 to 150  $\mu\text{m}$  from the soma, excitatory  
876 synapses from LGN were placed on basal and apical dendrites, 0 to 150  $\mu\text{m}$  from the soma, and  
877 inhibitory synapses were placed on the soma and basal and apical dendrites, 0 to 50  $\mu\text{m}$  from the soma.

878

#### 879 *Model of background inputs*

880 Whereas the recurrent connections within L4 and the LGN inputs (see below) were modeled explicitly,  
881 the connections from the rest of the brain were represented using a simple model of “background”  
882 traveling waves (see Main Text). For producing the waves, we distributed 3,000 Poisson spike  
883 generators in the x-y space covered by the model (the L4 plane), and drew random connections from  
884 these generators to the modeled L4 cells if the distance between a generator and a cell’s soma was  
885 within 150  $\mu\text{m}$ , allowing between 18 and 24 such connections per cell. This approximation of a small  
886 number of connections (much fewer than what is expected for incoming connections per L4 pyramidal  
887 cell from outside L4 or LGN) was chosen for simplicity and for reducing computing expense; in the  
888 absence of heterogeneity in the population of sources, providing a much larger number of connections  
889 does not appear necessary.

890 The background sources produced Poisson spike trains from a time dependent firing rate,  $f(x, y, t)$ , which  
891 was controlled by the plane traveling waves (see **Fig. 2**). The waves were pre-generated from a different  
892 random seed for each simulation trial. The direction of each wave’s movement in the x-y plane was  
893 randomly selected, its width in the direction of movement was kept constant in time, in the  
894 perpendicular direction the wave was infinite, and its magnitude was also constant and randomly  
895 selected to be between 5 and 15 Hz. In the absence of the wave,  $f(x, y, t)$  for each spike generator was  
896 set to zero, and it sharply rose to the value given by the wave’s height when the wave moved through  
897 the  $(x, y)$  location of the generator. The waves were produced so that they rarely overlapped, and thus  
898 the firing rate of the spike generators mostly exhibited periods of silence and periods of constant firing  
899 output, as waves swept through each generator’s location (see **Fig. 2**).

900 The utilization of background traveling waves furnished a simple and computationally efficient analogue  
901 of different cortical states. To approximate physiological observations with the choice of the wave  
902 parameters, we performed a small set of patch-clamp recordings in the pyramidal cells ( $n=3$ , targeting  
903 L2/3 neurons in V1 for easiness of access) of anesthetized mice. In the neural responses during



904 spontaneous activity (gray screen; **Fig. S1b**), we observed clearly distinct intervals of rest and baseline  
905 depolarization, and found that on average the duration of depolarized states was 700+/-300 ms and the  
906 interval between the end of one such state and beginning of the next was 1,100+/-600 ms, overall  
907 consistent with observations illustrated in the literature (e.g., [43, 42]). Clearly, this is only one  
908 measurement under particular conditions, and, generally speaking, the actual characteristics of the  
909 cortical states, such as duration of the hyperpolarized state, interval between such states, and also  
910 potentially gradations in the degree of depolarization or hyperpolarization, would depend on the type of  
911 modulation one considers. These characteristics may exhibit a variety of time scales. Nevertheless, it  
912 appears that largely these cortical states may be modulated on the time scale of 1,000 ms or longer, by  
913 the order of magnitude. Therefore, for simplicity, for the L4 model we generated background waves  
914 that lasted from 200 ms to 1,200 ms (i.e., 700 ms on average) and were separated by intervals of 250 ms  
915 to 1,750 ms (i.e., 1,000 ms on average) – both parameters being drawn randomly for each wave from  
916 uniform distributions. The spatial extent of each wave was set to 2,000  $\mu\text{m}$ , and the propagation speed  
917 was set based on that and on the randomly selected duration of the wave.

918 The remaining parameters were the number of synapses per connection from a spike generator to a L4  
919 cell and the conductance amplitude of these synapses at the synapse site. The amplitudes were set to a  
920 single number for cells of one type; the variation in the resulting postsynaptic potentials/currents  
921 (PSPs/PSCs) was due to varying synapse number per connection and random placement of synapses on  
922 the dendritic tree (see below for a general description of the choice of synaptic weights). First, the  
923 weights for the background synapses were set so that the  $V_m$  of target cells was elevated by 10-15 mV  
924 from rest during the wave condition (which was the amount of elevation we observed between the  
925 depolarized and rest states in the patch clamp experiments), in purely feedforward regime in absence of  
926 any other connections. The weights were then further adjusted to reproduce the spontaneous firing  
927 rates in the context of the full network (see below).

928 The number of synapses per background connection was the remaining parameter that we used to  
929 generate a long-tailed distribution of background input strengths, which we found to be important for  
930 producing a skewed (log-normal-like) distribution of firing rates (see **Fig. 3a**), as observed experimentally  
931 [5]. Specifically, for each L4 cell, the numbers of synapses for every background connection to that cell  
932 were the same, but differed between cells. These numbers were drawn from a long-tailed distribution  
933 heavily weighted towards 1 synapse, but permitting up to 16 synapses (**Fig. S1c**). As a result, most L4  
934 cells received similar amount of background excitation, but small fractions of cells received much higher  
935 amounts of background excitation.

936

### 937 *Synaptic characteristics*

938 Bi-exponential synapses (NEURON's Exp2Syn) were used for biophysical and instantaneous synapses for  
939 LIF target cells; the reversal potential was -70 mV for inhibition and 0 mV for excitation. For simplicity,  
940 synapses did not employ short-term or other plasticity rules and had 100% release probability. Although  
941 presence of such properties is well documented for individual cortical synapses, especially *in vitro*, their  
942 role in functional properties *in vivo* is not well understood. Short-term plasticity may be less prominent  
943 *in vivo* than *in vitro* (due to saturation to baseline levels) [8], whereas non-deterministic nature of  
944 individual synapses is somewhat alleviated by the fact that multiple such synapses are typically present

945 for each connection. The role of these properties *in vivo* is an important subject for future investigation.  
946 In the current study, neglecting these properties lead to significant conceptual simplifications as well as  
947 savings in computing power, and the generally good agreement of the neural activity in the simulations  
948 with the experiment (see Main Text) suggest that the role of these properties may be subtle and not  
949 straightforward to analyze. As a side observation, one should note that, because the modeled synapses  
950 were deterministic, the synaptic weights we used are probably underestimated in terms of the  
951 conductance values at the synapse location. However, the postsynaptic effects at the soma – peak PSPs  
952 and PSCs – were found to be consistent with the experiment (see below).

953 No complete resource exists yet with a characterization of synaptic weights and kinetics in L4 of mouse  
954 V1, and the literature on the subject of synaptic weights in general is large and somewhat disparate in  
955 the details of experimental methods used and features recorded and reported (such as post-synaptic  
956 potentials, or PSPs, vs. post-synaptic currents, or PSCs, definitions of time constants for PSP or PSC  
957 kinetics, etc.). Therefore, choices of synaptic weights in our models were guided only approximately by  
958 the existing literature on the synaptic properties of the cortex in various species (e.g., [25, 45, 47, 59,  
959 60]), and for various cortical areas and layers (e.g., somatosensory [47] and anterior cingulate [45]  
960 cortices). Because of the lack of a consistent benchmark, we aimed at restricting the synaptic weights  
961 and time constants within approximately an order of magnitude of the values reported across a variety  
962 of experimental studies. The kinetic parameters were fixed in the models, whereas the weights were  
963 allowed to be varied globally (such as, e.g., uniformly scaling weights of all excitatory synapses on  
964 Scnn1a biophysical cells by a multiplicative constant, etc.) at the optimization stage. The optimization  
965 stage aimed at reproducing firing rates to a grating, spontaneous activity, and avoid epileptic-like time-  
966 locked activity of all cells (see Main text). Once the weights were scaled so that these aims were  
967 approximately reached, they were kept constant throughout all simulations for a given model.

968 The synaptic weights were given constant values for each connection type (namely, four source types –  
969 excitatory from L4, inhibitory from L4, excitatory from LGN, and excitatory from background – to the  
970 seven target types – Scnn1a, Rorb, Nr5a1, PV1, PV2, and excitatory and inhibitory LIF), which for the  
971 biophysical cells corresponded to a constant value of the peak conductance at the synapse site. For the  
972 models where like-to-like synaptic weights were employed (LL and RL, see Main Text), the uniform  
973 synaptic weights from above were further multiplied by a factor  $F_w$  that depended on the difference  
974 between the assigned preferred orientation angle between the two cells:

975 
$$F_w = \exp\left(-\frac{\Delta\theta^2}{\sigma_\theta^2}\right),$$

976 where  $\Delta\theta$  is the angle difference (defined within  $90^\circ$ ), and  $\sigma_\theta = 50^\circ$  was used in all cases.

977 Despite weights at the synapse location being constant for most connection types, the actual PSPs or  
978 PSCs at the soma were widely distributed, because synapses were randomly distributed on the dendritic  
979 trees. The peak somatic PSCs for E-to-E synapses (**Fig. S1d**), for example, were observed in the model to  
980 be within 2 orders of magnitude, consistent with experimental findings [54]. Their distribution on the  
981 log scale was wide – i.e., similar to a skewed, lognormal distribution (or representable as a sum of a few  
982 lognormal distributions) described in the literature [5]. These distributions were very similar between  
983 the LL, RL, LR, and RR models, half of which employed constant E-to-E synaptic weights and other half  
984 used  $F_w$ -modulated weights.

985 After models were optimized and simulated, we extracted a subset of synaptic connections ( $n=100$ , each  
986 containing 3 to 7 synapses, as explained above) from each model for each connection type (E-to-E, E-to-  
987 I, I-to-E, I-to-I). We computed the PSCs and PSPs in voltage clamp and current clamp, respectively, and  
988 analyzed their peaks and time course (**Fig. S2**). For the current clamp measurements, current was not  
989 injected, thus allowing for characterization of synaptic properties near cell resting voltage. The voltage  
990 clamp measurements employed holding voltages of -70 mV and 0 mV to characterize excitatory and  
991 inhibitory synapses, respectively. For the time course characterization, we computed time to peak (time  
992 between the presynaptic spike and the peak), rise time (time between 20% and 80% of the peak at the  
993 rise stage), time of decay (the time constant from an exponential fit to the time course of decay, from  
994 80% to 20% of the peak value), and the width (width at the half-peak level).

995 Results of this analysis indicate that the characteristics of all PSPs and PSCs are, on average, very similar  
996 between all the models (**Fig. S2**). The latter observation for the peak values is interesting, as the models  
997 were optimized separately based on overall characterization of network dynamics, and in principle one  
998 could expect bigger differences in synaptic weights (and, thus, PSP/PSC peaks) for the LL, LR, RL, and RR  
999 models. Furthermore, characteristics of PSPs and PSCs in the models are broadly consistent with the  
1000 values reported in the literature, typically within a factor of 2 or less (e.g., [45, 47]; one should also note  
1001 differences between the cortical regions and layers, different preparations and experimental conditions,  
1002 as well as the naturally wide range of observed values). The trends observed in the literature were  
1003 reproduced as well, such as faster dynamics of postsynaptic events in PV cells than in excitatory cells  
1004 and a higher amplitude of inhibitory synaptic currents (e.g., [45]).

1005

#### 1006 *LGN filters*

1007 To enable simulations with arbitrary movies as visual stimuli, we developed a filter layer, the output of  
1008 which was used to drive the L4 model, representing inputs from the lateral geniculate nucleus (LGN).  
1009 The filters accepted movies ( $x,y,t$ -arrays) as inputs and produced time series of a firing rate as output.  
1010 The output firing rates were taken to represent the rates of LGN neurons, which project to L4.

1011 We used 3,000 filters each for three filter types – transient ON, OFF, and ON/OFF [6], i.e., representing  
1012 9,000 LGN cells. The transient types correspond to cells that produce an increase in firing rate to  
1013 transitions from dark to bright (ON), bright to dark (OFF), or both (ON/OFF), such that the firing rate  
1014 returns relatively quickly back to baseline levels after the change in scene. For simplicity, the sustained  
1015 LGN cell types [6], for which the firing rate may differ substantially from the baseline after the initial  
1016 transient (depending on the resulting brightness level), were neglected. The major reason for neglecting  
1017 these types and overall representing the LGN inputs with rather simple filters was that little is known  
1018 about how different LGN cell types combine their projections onto L4 neurons, and how properties of  
1019 these projections are correlated with functional properties of the target cells.

1020 Each LGN filter was represented by one (for ON and OFF filters) or two (for ON/OFF filters) receptive  
1021 subfields, which were described by the following equations (see **Fig. 1**). The linear response,  $L(t)$ , of a  
1022 receptive subfield was given by

1023 
$$L(t) = \int_0^t d\tau \iint dx dy D_t(\tau) D_S(x, y) S(x, y, t - \tau),$$

1024 where  $x$  and  $y$  are the coordinates in the visual space (angles),  $t$  is the time,  $S(x, y, t)$  is the input signal  
1025 (a movie),  $D_t(t)$  is the temporal kernel, and  $D_S(x, y)$  is the spatial kernel. For all operations with filters,  
1026 we used a linear angle approximation for  $x$  and  $y$  (that is, replacing the tangent of an angle by the angle  
1027 value in radians, which is approximately correct for small angles). The double-gaussian spatial kernel  
1028 (center-surround) was used,

$$1029 \quad D_S(x, y) = A_c \exp\left(-\frac{(x - x_0)^2 + (y - y_0)^2}{2\sigma_c^2}\right) - A_s \exp\left(-\frac{(x - x_0)^2 + (y - y_0)^2}{2\sigma_s^2}\right),$$

1030 where we used  $A_s = A_c/6$ ,  $\sigma_s = 2\sigma_c$ . The temporal kernel had the form

$$1031 \quad D_t(t) = k t \frac{\exp(-k t)}{1 - \frac{k^2 t^2}{6}}.$$

1032 The input signal was grayscale, represented on a 0 to 255 scale (from black to white), with a time step of  
1033 1 ms and the pixel size of  $1.25^\circ$  in  $x$  and  $y$  (the frames were  $192 \times 96$  pixels). It was fed directly into ON-  
1034 type receptive subfields, or converted to  $255 - S(x, y, t)$  and then fed into OFF-type receptive  
1035 subfields. The linear response  $L(t)$  was then combined with the baseline rate  $R_0$  and passed through a  
1036 rectifying nonlinearity, resulting in the firing rate:

$$1037 \quad R(t) = \max(R_0 + L(t), 0).$$

1038 For the ON/OFF filter,  $R(t)$  from the ON and OFF receptive subfields were summed, and the mean of  
1039 the corresponding  $R_0$  values was subtracted, to produce the final  $R(t)$  output.

1040 The resulting firing rate  $R(t)$  was converted to spike trains using a Poisson random process,  
1041 independently for each LGN filter (**Fig. 7a**). The firing rate exhibited a transient at the beginning of each  
1042 visual stimulus, due to transition from no visual stimulation to a movie. To avoid this artefact, we  
1043 always prepended 500 ms of full-field gray screen to a movie used as a visual stimulus, and replaced the  
1044 resulting first 500 ms of  $R(t)$  simply by  $R_0$ .

1045 The centers of the individual filters,  $(x_0, y_0)$ , were distributed randomly in the visual space, limited to  
1046 approximately  $130^\circ \times 90^\circ$ . The two receptive subfields of each ON/OFF LGN cell were displaced with  
1047 respect to each other (in random direction in  $x, y$  for each ON/OFF cell), so as to enable orientation  
1048 selectivity. Aside from that, the filters were axially symmetric, resulting in no orientation or direction  
1049 selectivity. The temporal and spatial frequency (TF and SF) selectivity was thus primarily determined by  
1050 the constants  $\sigma_c$ ,  $\sigma_s$ , and  $k$  in the spatial and temporal kernels.

1051 A new set of filters has been created for each of the three instantiations of the LL model type. These  
1052 three instantiations of filter sets were then used for the three models within the LR, RL, and RR types.

1053 The values of parameters for the filters were chosen randomly with a uniform probability within certain  
1054 range (**Table S1**). The ranges were selected to produce approximately the same preferred SF and TF  
1055 (0.05 cycles per degree, or cpd, and 4 Hz, respectively) across filters, which is approximately in the  
1056 middle of the typical preferred SF and TF range in real LGN cells [6]. Although real LGN cells exhibit a  
1057 wide range of preferred SF and TF values, we used the above simplification in order to avoid  
1058 complexities of how different information processing channels with different SF and TF tuning converge  
1059 on the L4 cells, as these aspects of feedforward connectivity from LGN to V1 are largely unknown. The

1060 specific choice of parameters also allowed for relatively wide tuning over SF and TF for our LGN filters,  
1061 even though the peak was almost always at SF=0.05 cpd and TF=4 Hz. This is generally consistent with  
1062 experimental observations, where most LGN cells exhibit smooth progression of diminishing responses  
1063 away from preferred SF and TF, rather than very sharply tuned responses [6].

1064 The above requirements were used to select values of  $\sigma_C$  and  $k$ . The baseline firing rate,  $R_0$ , was  
1065 selected to conform approximately to the levels of spontaneous activity exhibited by LGN cells [6] (**Table**  
1066 **S1**). The remaining free parameter,  $A_C$ , was selected so that the maximal observed F0 component (see  
1067 below) of the responses to gratings was 11-12 Hz (**Table S1**), also approximating experimental findings  
1068 [6]; +/-10% variation was allowed for this parameter.

1069 It should be noted that for this parameterization and for analysis described below we used the  
1070 definitions of the F0 and F1 components of responses to drifting gratings following Ref. [6]. Specifically,  
1071 we used the cycle-averaged firing histograms for each cell (using the cycle period of the drifting grating  
1072 stimulus); F0 was the mean rate computed from the histogram and F1 was the absolute value of the  
1073 Fourier component at the frequency of the drifting grating stimulus (i.e., for a sine function,  $a +$   
1074  $b \sin(\omega t)$ ,  $F_0 = a$  and  $F_1 = |b|$ ).

1075 Response properties of instantiated filters were analyzed and are presented in **Table S1**. Example  
1076 responses of a transient ON and transient ON/OFF filters to gratings, in terms of tuning to orientation,  
1077 SF, and TF, are also shown in **Fig. 7b** (responses of transient OFF cells are very similar to those of  
1078 transient ON cells, except being inverted with respect to dark vs. bright). These analyses show that  
1079 indeed the filters are not selective to the orientation and direction (except for F1 responses for transient  
1080 ON/OFF cells), and are tuned almost exclusively to SF=0.05 cycles per degree (cpd) and TF=4 Hz.  
1081 However, the SF and TF tuning of individual cells (**Fig. 7b**) is relatively broad, as intended.

1082

### 1083 *Supplying inputs from LGN filters to L4 neurons*

1084 Feedforward connections from groups of LGN filters to the L4 cells were created based on the shared  
1085 retinotopy. Whereas the LGN filters were defined in the visual space, the L4 cells were not, and for  
1086 connecting them we introduced retinotopy in the L4 model by mapping the x, y coordinates (i.e., the  
1087 plane of the layer) in the space of L4 cells to the x, y positions in the visual space. The center of the L4  
1088 model was assumed to correspond to the center of the visual space (i.e., center of the eye field). The  
1089 positions were mapped using the conversion factor (from physical to visual space) of 120°/mm in x and  
1090 50°/mm in y, following the experimental observation that representation of azimuth and elevation on  
1091 the surface of mouse V1 differs in length scale approximately by a factor of 2 [61]. With this mapping,  
1092 each L4 cell was assigned an x,y position in the visual space.

1093 To connect LGN cells to L4 cells, we created separate “lasso” subfields for each of three LGN types  
1094 (transient ON, OFF, and ON/OFF), independently for each L4 cell (**Fig. 7c**; see also **Fig. 1** in Main Text).  
1095 As above, a linear angle approximation was used here. The three subfields were positioned around the  
1096 visual-space x, y location of the L4 cell. The lasso subfields for inhibitory L4 target cells were bigger,  
1097 more symmetric, and more overlapping than those for excitatory target cells, since experimental studies  
1098 show that receptive fields of fast-spiking interneurons tend to be larger than those of excitatory cells in  
1099 L4 and L2/3, and orientation selectivity of fast-spiking interneurons is also significantly lower (see, e.g.,

1100 [62]). Specifically, for target L4 cells of PV1, PV2, and inhibitory LIF types, all lasso subfields were  
1101 centered at the L4 cell's position and were circular, with the diameter randomly selected from the range  
1102 [15°, 20°]. For the excitatory target cells, the ON/OFF lasso subfield was centered at the L4 cell's  
1103 position and was circular, whereas centers of the ON and OFF subfields were equidistant from the  
1104 center, separated by an offset distance chosen randomly from the range of [10°, 11°] (thus enabling  
1105 orientation selectivity and preference for a particular SF). These subfields were ellipsoidal (of equal size  
1106 for a given target cell), with the ellipse aspect ratio being selected randomly from a range of [2.8, 3.0].  
1107 The ellipse minor radius was chosen randomly from the range [3°, 4°], and the major radius was  
1108 computed by multiplying the minor radius by the aspect ratio. The minor axis was oriented along the  
1109 line connecting the center of the two subfields. The ON/OFF subfield radius was equal to the minor  
1110 radius of these ellipses.

1111

1112

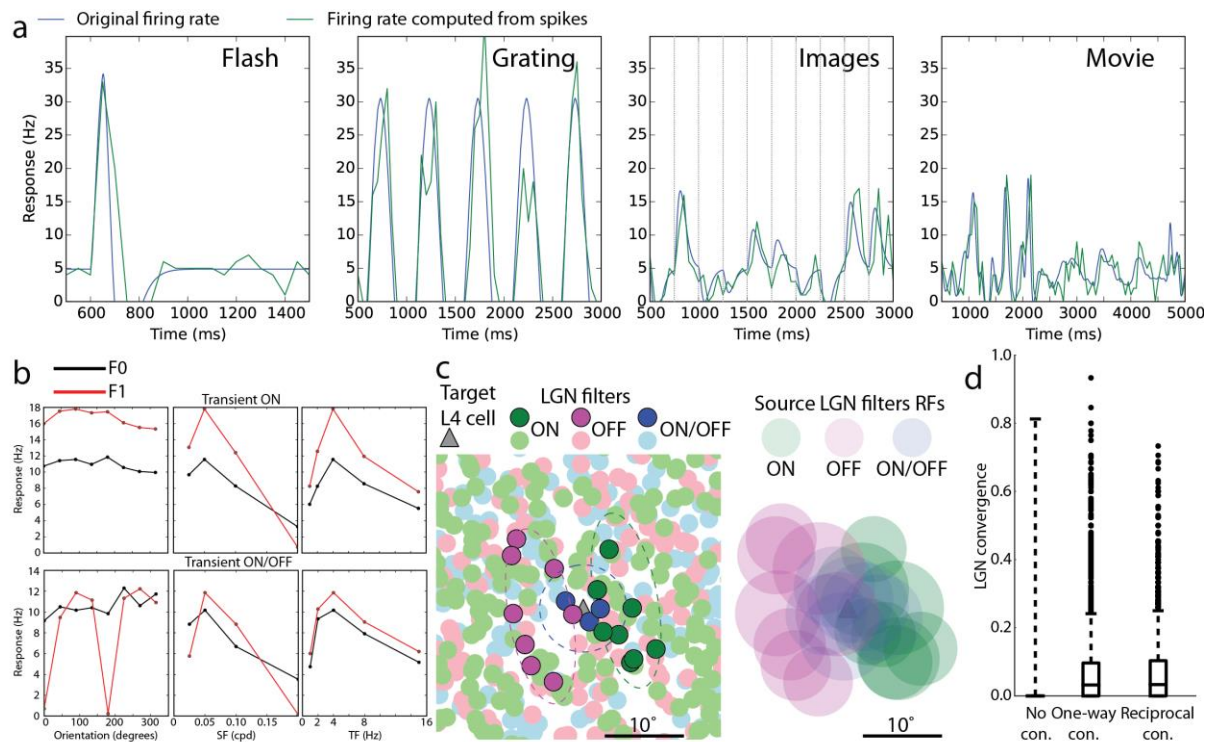

1113

1114 **Figure 7.** LGN filters. (a) Example responses of a single filter to visual stimuli, as a time-dependent firing rate that is the filter output (blue) and the firing rate computed from generated spike trains, averaged  
 1115 over all trials (green). For clarity, the first 500 ms of each trace are not shown; during this interval, the  
 1116 rate is set to a constant corresponding to the level of spontaneous activity of the filter. The panel for  
 1117 images contains responses to 10 images shown in a sequence, 250 ms each. (b) F0 and F1 components  
 1118 of the responses to gratings for two example LGN filters. Tuning curves to orientation, SF, and TF are  
 1119 shown. The data points are averages from generated spike trains over time and over trials. (c)  
 1120 Connecting LGN filters to L4 cells. Geometry in the visual space is illustrated. The left panel shows  
 1121 centers of all filters present in a portion of the visual space around the mapped position of an example  
 1122 excitatory cell from L4. The dashed lines correspond to the “lasso” subfields around one illustrative L4  
 1123 cell, used to capture input LGN filters of the ON, OFF, and ON/OFF type. The filters that are selected to  
 1124 send inputs to this L4 cells are in deep color; all other filters are dimmed. On the right, the same L4 cell  
 1125 with the filters selected to provide inputs to it are shown. For the filters, the approximate size of their  
 1126 receptive subfields is illustrated (a single subfield for ON or OFF filters and two subfields for ON/OFF  
 1127 filters; the radius of each RF circle is  $2\sigma_C$ ). (d) Convergence of LGN connectivity onto L4 cells that are  
 1128 not connected to each other (“No con.”), one-way connected (“One-way con.”), and reciprocally  
 1129 connected (“Reciprocal con.”). For each pair of L4 cells, the LGN convergence is defined as the number  
 1130 of LGN filters that connect to both cells divided by the sum of the numbers of LGN filters connected to  
 1131 each of the cells. The data are aggregated from three L4 models.  
 1132

1133

1134 For the excitatory L4 target cells, the choice of the direction in which the ON and OFF lasso subfields  
1135 were positioned (**Fig. 7c**) was determined by the assigned preferred orientation angle that was set for  
1136 each L4 cell at model construction. The angle between the vector connecting the centers of the ON and  
1137 OFF subfields and the (1, 0) vector in the visual space was chosen to coincide with this assigned  
1138 preferred orientation angle. Note that the actual preferred orientation angle was determined by the  
1139 network activity in the simulations, and generally speaking did differ (more or less) from the assigned  
1140 one.

1141 Once all the lasso subfields were established for an L4 cell, the corresponding LGN cells were selected  
1142 based on whether centers of their spatial kernels happened to be inside the subfields or not. Among  
1143 those inside, a random set of LGN cells was selected, with the total number of each LGN type selected  
1144 for one L4 target cell being capped at 15 for the inhibitory target cells and at 8 for the excitatory target  
1145 cells (i.e., because we used 3 types of LGN cells, the maximum number of source LGN cells was 45 for  
1146 inhibitory targets and 24 for excitatory targets). For the ON/OFF filters, the additional condition applied  
1147 during the selection of sources, which required that selected filters were oriented (i.e., the axis  
1148 connecting the centers of their ON and OFF subfield was oriented) within  $\pm 15^\circ$  from the assigned  
1149 preferred orientation angle of the L4 cell. In terms of connections from individual LGN filters to L4 cells,  
1150 after instantiating models we found broad diversity in the number of target L4 cells per LGN filter, from  
1151 0 to several hundred; on average, one LGN filter connected to 100  $\pm$  170 L4 cells.

1152 Since the LGN filters used did not represent all the LGN cell types (specifically, no sustained types [6]),  
1153 we assumed that the number of synapses they provided to the L4 cells was smaller than the total  
1154 expected number of synapses from the LGN ( $\sim 1,000$ , see Main Text). We thus set the number of  
1155 synapses per each LGN filter connected to an L4 cell to be 30, resulting in approximately 600 synapses  
1156 from the LGN for each L4 excitatory cell.

1157 The geometric constraints above (size and separation of the lasso fields, etc.) were chosen to reflect  
1158 approximately the characteristics of the receptive fields of the LGN inputs to L4 excitatory cells, based  
1159 on *in vivo* measurements of LGN-only currents into L4 cells, resulting from visual stimulation [7], and  
1160 also taking into account typical sizes of the receptive fields of LGN cells themselves, based on  
1161 extracellular electrophysiological measurements [6]. Arguably, the constraints we applied were  
1162 representative of a typical case, but did not reflect the considerable diversity of the receptive field sizes  
1163 and shapes [6, 7]. This was done for simplicity, as we aimed to represent well the responsiveness of the  
1164 LGN and L4 cells to SFs and TFs that are in the middle of typical values that evoke robust responses *in*  
1165 *vivo* (SF $\sim 0.05$  cpd and TF $\sim 4$ Hz). Introducing more diversity would require further assumptions about  
1166 connectivity from LGN to L4 and within L4, in absence of data. Another note is that the choice of the  
1167 geometry of “lasso” subfields (high aspect ratios) may appear to contradict observations of the rather  
1168 symmetrical and highly overlapping subfields for LGN inputs to L4 [7]. However, due to the large size of  
1169 individual LGN filter receptive fields, the combined receptive subfields for the LGN inputs to L4 cells  
1170 were not extremely elongated and exhibited certain degree of overlap (see example on the right in **Fig.**  
1171 **7c**), similar to the experimental observations.

1172

1173 *Stimulation protocol*



1174 All simulations were performed with visual stimuli chosen among drifting gratings, natural movies,  
1175 natural images, moving bars, and full-field flashes (**Fig. S3**, the first three are part of the stimulus set in  
1176 the Allen Brain Observatory [53]). Separate simulations with uniformly gray screen were also carried out  
1177 to characterize spontaneous activity. The list of all visual stimuli used for all model systems is presented  
1178 in **Table S2**. All stimuli were mapped (linearly subsampled or interpolated) to 192x96 pixels and time  
1179 step of 1 ms. Each trial was a separate simulation. Typically, 10 trials were simulated for each stimulus  
1180 condition, with some exceptions specified below.

1181 Drifting gratings were square-wave alternating white and black stripes (typically at contrast 80%,  
1182 although simulations with other contrasts were performed as well), drifting in the direction  
1183 perpendicular to the stripes, at 0, 45, 90, 135, 180, 225, 270, or 315 degrees. For LGN filter  
1184 characterization, 240 different gratings were used, in combinations of the 8 directions listed above, 6 SF  
1185 (0.025, 0.05, 0.1, 0.2, 0.4, and 0.8 cpd), and 5 TF (1, 2, 4, 8, and 15 Hz). Due to the high computational  
1186 expense associated with running simulations of the L4 model, and because the LGN filters were tuned to  
1187 respond preferentially to SF  $\sim$  0.05 cpd, for the full model simulations we used a subset of these 240  
1188 conditions. A single SF=0.05 cpd and a few TF (typically, 2, 4, and 8 Hz) were used, with all 8 directions  
1189 (**Table S2**). After the initial 500 ms of the gray screen, the gratings were presented for 2500 ms.

1190 The gratings were named from g1 to g240 in the following manner: starting from the minimal TF, SF, and  
1191 direction angle for g1, the numbering increased first along the TF dimension, then along the SF  
1192 dimension, and finally along the direction dimension. Thus, for example, g1, g2, g3, g4, and g5 were all  
1193 at direction 0 degrees, SF=0.025 cpd, and TF varying from 1 to 15 Hz; or, gratings with a given SF and TF,  
1194 such as SF = 0.05 cpd and TF = 4 Hz, had numbers that were always separated by 30 – g8, g38, g68, g98,  
1195 g128, g158, g188, g218, for directions 0, 45, 90, 135, 180, 225, 270, and 315 degrees, respectively. (See  
1196 *Supplementary Files* and **Table S2** for more details.)

1197 Natural movies were 3 clips from the opening scene of *Touch of Evil* [63, 53]. After the initial 500 ms of  
1198 the gray screen, the movies were presented for 4500 ms. The three clips were named  
1199 "TouchOfEvil\_frames\_N1\_to\_N2", where N1 and N2 were the first and last frame based on the  
1200 sequence from the original movie clip (these frames were 33 ms each, as the movie was encoded at 30  
1201 Hz rate; the clips used for simulations were upsampled to 1 kHz rate). The N1 and N2 were 1530 and  
1202 1680 for the first clip, 3600 and 3750 for the second, and 5550 and 5700 for the third.

1203 For natural images, we used 10 examples taken from the Berkeley Segmentation Dataset [64] and the  
1204 van Hateren Natural Image Dataset [65] (see also [53]). Each trial consisted of a 3000 ms long  
1205 simulation, with the first 500 ms being the gray screen, and the rest covered by presentation of the 10  
1206 images in a random sequence, for 250 ms each, without interruption. We carried out simulations of 100  
1207 such trials, each named "imseq\_i", where i was 0 to 99 ("imseq" standing for "image sequence").

1208 Moving bars were single white or black stripes on gray background, moving with constant velocity in a  
1209 direction perpendicular to the stripe. Four conditions were assessed – a black or white vertical bar  
1210 moving left to right, and a black or white horizontal bar moving bottom to top. The bars were  
1211 approximately 4 degrees wide and moved with the velocity of 33.8 degrees per second. These  
1212 simulations were named "Bbar\_v50pixps\_hor", "Bbar\_v50pixps\_vert", "Wbar\_v50pixps\_hor", and  
1213 "Wbar\_v50pixps\_vert".

1214 Two types of full-field flashes were used (named "flash\_1" and "flash\_2"). For type 1, the screen was  
1215 gray from 0 to 1000 ms, white from 1000 to 2000 ms, and gray again from 2000 to 3000 ms. For type 2,  
1216 the screen was gray from 0 to 600 ms, white from 600 to 650 ms, and gray again from 650 to 1500 ms.

1217 Spontaneous activity was measured during 1000 ms long presentation of gray screen. Typically, 20 trials  
1218 were used. These simulations were named "spont".

1219 All analysis generally disregarded the first 500 ms of each simulation, as an equilibration period (with  
1220 gray screen presented as a visual stimulus during this time in all cases).

1221 For computational efficiency, a core set of stimuli from those described above was used for all systems  
1222 (three cases each of LL, LR, RL, and RR), whereas the rest were applied in a targeted manner, primarily  
1223 for the LL system (**Table S2**). Out of those, the richest set of stimuli was applied to model 2 of the LL  
1224 type ("LL2").

1225 The LGN filter and background source projections to the L4 cells were generated independently for the 3  
1226 models of the LL type and then reused for the 3 models each of the LR, RL, and RR types. The same  
1227 procedure was applied to recurrent connections for LL and LR cases, as well as for RL and RR.

1228 Furthermore, each trial of visual stimulation was accompanied by an independently generated trial of  
1229 the background activity. These were generated independently for the 3 models of the LL type, and then  
1230 applied consistently to the 3 models of the LR, RL, and RR types. Thus, for example, the LGN and  
1231 background feedforward connections, as well as LGN and background spike trains incoming to the L4  
1232 cells on a particular trial of a given visual stimulus, were exactly the same between the models LL2, LR2,  
1233 RL2, and RR2, but different from, e.g., LL1 or RL3.

1234

### 1235 *Modeling optogenetic perturbations*

1236 A number of simulations was performed to mimic the effects of optogenetic manipulations (see below  
1237 for experimental details). The experimental optogenetic perturbation involved silencing of Scnn1a cells  
1238 expressing ArchR through application of yellow light. To model such a perturbation, we injected  
1239 hyperpolarizing current into somata of cells in our simulations (**Fig. S7**). We selected the cell type to be  
1240 directly perturbed (typically Scnn1a), and a fraction of the cells in this cell type (all the cells in the cell  
1241 type that were outside of this fraction did not receive current injections), and applied the current  
1242 injections to those cells.

1243 Since the light spot used in the experiments was ~2 mm in diameter, in most simulations we applied  
1244 perturbation over the whole area of our model (which was ~1.7 mm in diameter), including the LIF  
1245 neurons. In a subset of simulations LIF neurons were not affected (this difference did not qualitatively  
1246 affect the observed trends). Delivering direct current injections to LIF neurons was not supported in the  
1247 NEURON implementation we used, and thus we opted for adding inhibitory synapses to LIF neurons that  
1248 were selected for optogenetic perturbations. A single such synapse was added to each silenced LIF  
1249 neuron, and received a Poisson spike train at 100 Hz frequency. The synaptic weight was calibrated to  
1250 result in the reduction of the LIF neuron's firing rate similar to that effected by a -100 pA current  
1251 injection to the soma of biophysically detailed cells in a benchmark simulation. To represent different  
1252 current injections, we linearly scaled the synaptic weights for these synapses on the LIF neurons. The LIF  
1253 neurons were selected for receiving such perturbation based on the fraction of cells represented by the

1254 perturbed cell type and the fraction of cells selected for perturbation within the type. For example,  
1255 Scnn1a constituted 43.5 % of all excitatory biophysical neurons; if we were applying optogenetic  
1256 perturbation to 20% of Scnn1a biophysical cells, then we correspondingly applied perturbation via  
1257 inhibitory synapses to 8.7 % of all LIF excitatory cells.

1258 The modeled optogenetic manipulation was applied at the beginning of the simulation and was  
1259 maintained throughout the simulated time. For majority of these simulations, the injection current  
1260 levels were -30, -50, -100, and -150 pA, whereas the fractions of Scnn1a population receiving such  
1261 injections were 20, 50, and 100% (see **Table S2**).

1262 Optogenetic silencing of the LGN [8] (**Fig. 5d**) was modeled by eliminating all spikes coming from LGN  
1263 filters starting at a desired time. For this study, such a time was always set to 1000 ms from the  
1264 beginning of a simulation.

1265

## 1266 ***Experimental Methods***

1267 All experiments, animal treatment and surgical protocols were carried out with authorization from the  
1268 Institutional Animal care and Use Committee of the Allen Institute in accordance with the Public Health  
1269 Service (PHS) Policy on Humane Care and Use of Laboratory Animals.

1270

### 1271 *Experimental characterization of LGN-to-L4 synapses*

1272

1273 The synapse counts were performed using disectors on a systematic random sampling scheme. This  
1274 allows for unbiased sampling and it has been used in other cortical areas and animals models (e.g. [66,  
1275 39]). We cannot however identify the cell type of the post synaptic target and therefore we assume that  
1276 thalamic neurons target cell types according to the available dendrite of each cell. Though exceptions to  
1277 this rule have been found in other areas or animal models, the contribution of L5 and L6 apical dendrites  
1278 to the overall dendritic length in L4 is expected to be smaller than the dendrite from L4 neurons and one  
1279 expects that it will not change substantially the proportion of thalamic synapses onto L4 in ways that  
1280 would affect the predictions of the model.

1281 We labeled thalamic boutons with immunohistochemistry for VGLUT2, selected sampling sites using  
1282 rare systematic random sampling and then used the physical disector method introduced by [67] to  
1283 perform the synaptic counts.

1284 *Histology:* Wild type mice were perfused with fixative (2% paraformaldehyde and 0.5% glutaraldehyde)  
1285 and a series of 60 um coronal slices through primary visual cortex (V1) was taken, and alternating slices  
1286 were processed for electron microscopy (EM) with immunohistochemistry, or processed with Nissl stain  
1287 for light microscopy (LM).

1288 Slices selected for immunohistochemistry were incubated in anti vesicular glutamate transporter 2  
1289 (VGLUT2) antibody. Nickel intensified diaminobenzidine or silver intensified gold particles were used to  
1290 visualize the labeled elements in the electron microscope (EM). Slices were then osmicated, dehydrated  
1291 and embedded in Durcupan resin.

1292 We used as a primary antibody anti-VGLUT2 from Millipore, catalog number MAB5504 (lot 2322521).  
1293 The secondary antibody was biotinylated-goat-anti-mouse IgG, from vector BA-9200 (lot X0623). Anti-  
1294 VGLUT2 primary antibodies label thalamic terminals in several species including the mouse visual,  
1295 somatosensory and motor cortices [68, 39] and it had been validated in layer 4 of mouse visual cortex by  
1296 co-labeling of axons that have been injected in the thalamus [68]. The distribution of labeled terminals  
1297 in this study matches the one previously observed in the cited works.

1298 *Sampling:* Slices, grids, sections and sampling sites were chosen using a systematic random sampling  
1299 (SRS). A random number in the range of the number of slices was generated via computer, and used to  
1300 select target coronal slices for the EM series. A general region of interest in V1 was then selected based  
1301 on comparison to the cytoarchitecture of the immediately adjacent Nissl-stained sections. This region of  
1302 interest, which contained layer 4, was excised from the EM slice, trimmed, and sectioned with an  
1303 ultramicrotome at 40 nm thickness and serial section ribbons collected onto copper grids. Labeled  
1304 terminals were then examined and photographed in a Jeol 1200 EX II electron microscope using a digital  
1305 camera (Gatan).

1306 Low magnification EM images were overlaid and used to co-register the EM sections with the LM (Nissl)  
1307 images, using vasculature and cell body (soma) landmarks. The Layer 4 region was determined by cyto-  
1308 architecture, then drawn on the EM image.

1309 *Physical disector:* A regular sampling grid of 45 x 45  $\mu\text{m}$  was generated within this layer 4 region, and  
1310 high magnification images were taken at each of these sampling points for disector analysis. Reference  
1311 and lookup section were separated by one intervening ultrathin section so that the disector 'z'  
1312 dimension was 0.08  $\mu\text{m}$ . Both sections were used as reference and as lookup in order to double the  
1313 sample [66, 69]. Three hundred and forty one disectors were used from 3 mice. The disectors had a size  
1314 of 5 x 5  $\mu\text{m}$  and at 3.6 nm per pixel. Synapses and associated structures were classified using  
1315 conventional criteria [70, 71]. The percentage of thalamic synapses was calculated by dividing the  
1316 number of synapses formed by labeled boutons by the total number of asymmetric synapses (putative  
1317 excitatory).

1318

1319 *Extracellular electrophysiological recordings in vivo*

1320 All electrophysiological recordings were performed in the left hemisphere of awake adult C57Bl/6 mice  
1321 (2 to 6 months, males). A few weeks before the recordings, mice were first implanted with a metallic  
1322 headplate using aseptic conditions and under anesthesia (see details in [6]). The day before or of  
1323 recording, we performed a craniotomy over V1 (~0.5 x 0.5 mm above the monocular portion of V1, 2.5  
1324 mm lateral to lambda) and implanted a reference skull screw; if the day before, then the exposed skull  
1325 was sealed with Kwik Cast. On the day of recording the exposed cortex and skull were covered with 1%  
1326 agarose in saline in order to prevent drying and to help maintaining mechanical stability.  
1327 Dexamethasone was given to the animals to avoid brain inflammation (2 mg/kg, sc) and atropine to  
1328 keep the respiratory tract clear (0.3 mg/kg, ip). Then, awake mice went into the recording setup. The  
1329 headplate was clamped for stability, while the animal was free to run or remain still on a freely rotating  
1330 disk. Multi-site silicon electrode arrays (imec Neuropixels) were dipped in Dil allowing post hoc  
1331 visualization of the electrode path and lowered with a microdrive to a depth of 800-1000  $\mu\text{m}$ . Reference  
1332 and ground of the electrode were made through screws implanted in the skull. To improve the stability  
1333 of recorded units, we allowed 20 minutes for the electrodes to settle.

1334 Neurophysiological signals were amplified, band-pass filtered, and acquired continuously at 20 or 30 kHz  
1335 at 16-bit resolution using an Amplipex system (Amplipex Ltd) or Open Ephys system (open-ephys.org).  
1336 The spike sorting procedure was described in detail previously [72]. In brief, algorithmic identification  
1337 and unit assignment of spikes [73, 74] was followed by manual adjustment of the clusters [75, 76]. Only  
1338 units with clear refractory periods and well-defined cluster boundaries were included in the analyses  
1339 [73].

1340 Visual stimuli were largely the same as described above for simulations. The number of trials in the  
1341 experiments was 50 for flashes, 10 for natural movies, and 100 for natural images. Rates of  
1342 spontaneous activity were calculated by averaging the rates of each cell over 20 non-overlapping  
1343 intervals, 500 ms long each, that were evenly distributed over 1 minute of continuous gray screen  
1344 presentation (20 intervals of 500 ms were used for consistency with the 20 trials of gray screen  
1345 presentation in simulations; see above). Moving bars were not used. Data for drifting gratings was  
1346 taken from a previously published dataset [6].

1347 After the recording, mice were perfused and brains fixed, sectioned, and stained with DAPI (see details  
1348 of histology and imaging in [6]) for reconstruction of the electrode path to assign a layer to each  
1349 recording site.

1350 The laminar location of neurons was identified using histology and confirmed, when possible, by  
1351 investigating the CSD depth profile of responses to full-field flashes. Putative excitatory neurons  
1352 belonging to L4 according to this annotation were used for analysis. Since L4 is thin, and the fraction of  
1353 inhibitory neurons is only ~15%, we could not obtain a sizeable number of such neurons for L4 in our  
1354 recordings. Because of that, putative fast-spiking inhibitory neurons from all layers were combined for  
1355 analysis.

1356

#### 1357 *Whole-cell patch-clamp in vivo recordings*

1358

1359 Data of *in vivo* intracellular membrane potential ( $V_m$ ) was obtained from genetically defined neuron  
1360 populations in cortical layer 2/3 of mouse V1 via two-photon targeted whole-cell recordings. Adult (2 –  
1361 4 months old,  $n = 2$ ) transgenic mice expressing a red fluorescent cytosol marker tdTomato (tdT) under  
1362 the control of the Cux2-CreERT2 promoter were used. Recordings were performed under Isoflurane (1–  
1363 1.5% in  $O_2$ ) anesthesia with ~7 M $\Omega$  glass micropipettes filled with K-Gluconate based internal solution  
1364 (containing, in mM: potassium gluconate 125, NaCl 10, HEPES 20, Mg-ATP 3, Na-GTP 0.4, in ddH $_2$ O; 290  
1365 mOsm; pH 7.3; Alexa 488, 50  $\mu$ g/ml). Exposed V1 region was covered with Artificial Cerebrospinal Fluid  
1366 (ACSF) containing (in mM: NaCl 126, KCl 2.5, NaH $_2$ PO $_4$  1.25, MgCl $_2$  1, NaHCO $_3$  26, glucose 10, CaCl $_2$  2, in  
1367 ddH $_2$ O; 290 mOsm; pH 7.3). tdT expressing neurons within 100  $\mu$ m – 300  $\mu$ m underneath the pia surface  
1368 were targeted and patched, as described previously [77, 78, 79].

1369 Two-photon imaging was performed using a Sutter Moveable Objective Microscope (Sutter, CA USA)  
1370 coupled with a tunable Ti:Sapphire femtosecond laser (Chameleon Ultra II, Coherent USA), controlled by  
1371 the open-source software ScanImage 3.8 (Janelia Research Campus/ Vidrio Technologies), to visualize  
1372 L2/3 neurons in V1. Neurons were imaged with a 40x water-immersion objective (LUMPLFLN 40XW,  
1373 Olympus USA) at the excitation wavelength of 920 nm. Electrophysiology Signals were amplified with a  
1374 Multiclamp 700B, digitized with a Digidata 1440B at 20kHz, using pClamp software (Molecular Devices)

1375 and stored on a PC (Dell, USA). Quality of the pipette was checked both electrically and optically. Pipette  
1376 would be discarded if disproportional increase of pipette resistance ( $R_p$ ) occurred, which indicates  
1377 occlusion of pipette tip. Optically checked ejection of dye under two-photon imaging was also used to  
1378 indicate whether the pipette was free of occlusion. If both the electrical and optical measures agreed  
1379 the tip is clogged, the penetration would be terminated and the pipette was retracted and discarded.

1380 To conduct *in vivo* whole-cell recordings, clean pipette was manually advanced towards the target  
1381 neuron with a low positive pressure ( $\sim 20$  mbar above ambient) under two-photon imaging with  $R_p$   
1382 constantly monitored. Pipette capacitance was compensated before patching the cell. Standard  
1383 procedures were used to rapidly form a gigaseal [77, 78, 79]. After gigaseal formation, a brief negative  
1384 pressure was used to rupture the membrane inside the tip to achieve the whole-cell configuration.  $V_m$   
1385 was recorded under current clamp mode with series resistance ( $R_{series}$ ) appropriately compensated.  
1386 Spontaneous  $V_m$  activity was recorded for at least 1 – 2 mins. The recordings were not corrected for  
1387 liquid junction potential.

1388

### 1389 *Optogenetic manipulations and extracellular electrophysiological recordings in vivo*

1390 We performed *in vivo* multichannel silicon probe recordings from the primary visual cortex of mice as  
1391 previously described [52]. Briefly, mice were anesthetized with a combination of 5 mg/kg  
1392 chlorprothixene (intraperitoneal) and 1.2 g/kg urethane (intraperitoneal); during surgery mice were  
1393 supplemented with 0.5-1.0% isoflurane. A head frame with an  $\sim 2$  mm central opening was mounted  
1394 over V1 and the skull was thinned using a dental drill. PBS was then applied to the thinned skull and  
1395 sharpened forceps were then used to remove a small portion of skull wide enough to permit insertion of  
1396 a NeuroNexus 32-channel linear probe (A1x32-Edge-5mm-20-177). The probe was inserted at a depth of  
1397 800–1,000  $\mu\text{m}$ . PBS was then applied to keep the craniotomy moist. Following a recovery period  
1398 following probe insertion of at least 20 minutes, visual stimuli were presented using a gamma-corrected,  
1399 Dell 52 3 32.5 cm LCD monitor (60 Hz refresh rate, mean luminance 50 cd/m<sup>2</sup>, 25 cm from contralateral  
1400 eye). We used the Psychophysics Toolbox [80] to generate and present full-field sinusoidal drifting  
1401 gratings (temporal frequency, 2 Hz; Spatial frequency, 0.04 cycles per degree; 2 orientations, 0 and 90  
1402 degrees; contrasts 0, 10, 18, 32, 64, and 100% contrast). Drifting gratings were presented for 1500 ms  
1403 and optogenetic stimulation trials were interleaved with non-optogenetic trials. Each trial was separated  
1404 with 3-6 s inter-trial interval with a gray screen. To photostimulate archaerhodopsin (optogenetic trials)  
1405 we used a 1 mm LED fiber with  $\sim 20$  mW power output at the fiber tip, which was placed 0.5 mm from  
1406 skull above recording location (590 nm, 1 mm diameter, Doric Lenses). The optogenetic light delivery  
1407 lasted 1.9 s and started 200 ms prior to the visual stimulus and ended 200 ms following the stimulus.  
1408 Black foil (Thor Labs) was shaped into a shield around LED and headframe in order to prevent the LED  
1409 light from reaching the eyes. Recordings were amplified 1,000X and band-pass filtered between 0.3 Hz  
1410 and 5 kHz using an AM systems 3500. Acquisition was done at 20 kHz with a NIDAQ PCIe-6239 board  
1411 using custom MATLAB software (MathWorks).

1412 Data were analyzed with custom-written software using MATLAB. Single units were isolated using  
1413 software provided by D.N. Hill, S.B. Mehta, and D. Kleinfeld [81]. Signals were high-pass filtered at 500  
1414 Hz and waveforms were extracted from four adjacent electrode sites. Spikes were defined as events  
1415 exceeding 4–5 SD of the noise. Waveforms were clustered using a k-means algorithm and further  
1416 aligned using a graphical user interface. Fisher linear discriminant analysis and refractory period

1417 violations were used to assess unit isolation quality. Units were assigned a depth based on the channel  
1418 in which they showed the strongest signal. In this work, only the data corresponding to drifting gratings  
1419 with 100% contrast was used.

1420 The following mouse lines were used for in vivo extracellular recordings: Scnn1a-Tg3-Cre (stock number:  
1421 009613; B6;C3-Tg(Scnn1a-cre)3Aibs/J) and Ai35(RCL-Arch/GFP) (stock number: 012735; B6;129S-  
1422 Gt(ROSA)26Sortm35.1(CAG-aop3/GFP)Hze/J).

1423

## 1424 **Data Analysis**

1425 Data analysis was performed on all simulations carried out for a given stimulus, as described in **Table S2**.  
1426 That typically involved at least two independent models (usually three models) and multiple trials. Data  
1427 from these multiple models and trials were typically combined together to produce summary plots.

1428 Summary figures that present box plots of various analyzed quantities adhere to the following standard.  
1429 The box bottom and top represent the lower boundary of the second quartile of the data and the top  
1430 boundary of the third quartile, respectively, thus marking the inter-quartile range (IQR); the median is  
1431 shown in red. Whiskers mark +/-1.5 IQR from the bottom and top of the plot, as long as there are data  
1432 points in that range. The rest of the data (outliers) are shown as separate dots or other symbols. In  
1433 cases when the plot range does not include the whole span of the data (which was sometimes necessary  
1434 due to the log-normal-like distribution of the data points over several orders of magnitude), the outliers  
1435 outside of the plot range are not shown explicitly but are instead indicated by an arrow. The numbers  
1436 next to such arrows (“N1/N2”) indicate the number of such outliers that are not shown (N1) and the  
1437 total number of data points (N2). The mean and s.e.m. of the data are shown on these plots as circles  
1438 with error bars (thick black lines).

1439

## 1440 *Computation of the features of firing rate responses*

1441 Spontaneous activity was characterized by analyzing the responses of cells from 20 gray screen trials,  
1442 each 1,000 ms long. For each cell, the spikes from the second 500 ms of every trial were used to  
1443 compute the firing rate, which was then averaged over trials.

1444 The maximal response to gratings ( $R_{max}$ ), the orientation selectivity index (OSI) and the direction  
1445 selectivity index (DSI) were computed using responses to drifting gratings (disregarding the first 500 ms  
1446 of the gray screen). First, the firing rate for each cell was obtained, using spikes from the 2,500 ms of  
1447 grating presentation, and averaging over all trials. This rate was computed separately for every grating  
1448 condition. The  $R_{max}$  metric for each cell was the maximal firing rate among all conditions.

1449 Following [6], we used the firing rate directly to compute the OSI and DSI (i.e., without subtracting the  
1450 spontaneous rate). The analysis was performed for each cell independently. For each orientation, an  
1451 average response across all SF and TF was computed, and the orientation that corresponded to the  
1452 greatest averaged response was assigned as the preferred orientation of the cell. The SF and TF that  
1453 evoked the strongest response at the preferred orientation were then considered as preferred  
1454 frequencies. OSI and DSI were computed using the responses at all orientations for these preferred SF  
1455 and TF. The OSI was computed as one minus the circular variance,

1456 
$$OSI = \left| \frac{\sum_k f_k e^{2i\theta_k}}{\sum_k f_k} \right|,$$

1457 where  $k$  is the index for summation over all directions  $\theta_k$ , and  $f_k$  is the firing rate response for each  
1458 direction. The DSI was computed as

1459 
$$DSI = \frac{f_{pref} - f_{null}}{f_{pref} + f_{null}},$$

1460 where  $f_{pref}$  is the firing rate response at the preferred direction ( $\theta_{pref}$ ) and  $f_{null}$  is the response at the  
1461 opposite direction ( $\theta_{pref} + \pi$ ).

1462 Responses to flashes were characterized by averaging firing rates of multiple cells in multiple trials, in 2  
1463 ms bins. The number of trials was 10 for simulations and 50 for experiments. For simulations, the  
1464 averaging was done separately for each of the two models for which 50 ms flash stimuli were simulated,  
1465 and for each of the three biophysical excitatory cell populations, resulting in 6 firing rate vs. time traces.  
1466 For experiments, the averaging was done separately for each mouse over all L4 excitatory cells, resulting  
1467 in 8 traces. The peak magnitude and time to peak from the flash onset were then computed on each of  
1468 those traces for the 1st and 2nd peaks.

1469

#### 1470 *Spectra of the local field potential (LFP) and of spiking activity*

1471 The extracellular potential  $\Phi$  was calculated along the central axis of the model (perpendicular to the L4  
1472 plane), at locations distributed with the increments of 10  $\mu\text{m}$  along the axis. The extracellular potential  
1473 at the  $j$ -th location (i.e., electrode site) for a particular cell was computed as  $\Phi_j = \sum_k R_{jk} I_k$ , where  $I_k$  is  
1474 the membrane current through the  $k$ -th neuronal compartment and  $R_{jk}$  is the transfer resistance  
1475 between  $k$ -th neuronal compartment and the  $j$ -th electrode site. The transfer resistances were  
1476 computed using the line-source approximation [82] assuming homogeneous and isotropic extracellular  
1477 conductivity of 0.3 S/m. The contributions of the individual cells to the recordings are then summed up  
1478 to find the total recorded potential at each recording electrode site. The membrane currents were  
1479 obtained with NEURON's `cvsolve.use_fast_imem()` function which returns the transmembrane currents  
1480 without needing to utilize the computationally expensive extracellular mechanism. The computation of  
1481 the extracellular potential was implemented by modifying the NEURON's `advance()` function—called on  
1482 each time step—to include the function call to our Python module computing the extracellular potential.

1483 The local field potential (LFP) was obtained by low-pass filtering the simulated extracellular potential  
1484 with the 6th-order Butterworth filter, with the cutoff frequency of 200 Hz. The power spectra of the LFP  
1485 (computed employing the fast Fourier transform) were then used for analysis of oscillations in  
1486 population activity. The LFP recorded at the site closest to the center of the model was utilized for this  
1487 analysis.

1488 Power spectra of spiking activity (**Fig. S6**) were computed as follows. A position in space was selected  
1489 for recording; in all cases in this work we chose the center of the model for this purpose. The signal was  
1490 then computed as the inverse-distance weighted multiunit activity, i.e., the time-binned firing rate  
1491 accumulated from all neurons with the weight  $1/r_i$ , where  $r_i$  is the distance from the neuron's soma to



1492 the recording position. The time bin of 1 ms was used. The power spectrum was then computed using  
1493 fast Fourier transform.

1494 Both LFP and spiking activity spectra were averaged over all trials of a given stimulus.

1495

#### 1496 *Computation of sparsity*

1497 Sparsity of responses was computed following the definition in [50]. The formula used was

$$1498 \quad S = \frac{1 - \frac{\left(\frac{\sum_i f_i}{n}\right)^2}{\frac{\sum_i f_i^2}{n}}}{1 - \frac{1}{n}},$$

1499 where  $S$  is the sparsity,  $f$  is the response (we used the firing rates averaged for each cell within each  
1500 time bin over all trials for a given visual stimulus), and  $n$  is the number of samples  $i$ . The lifetime  
1501 sparsity can be defined for each cell, and then samples  $i$  correspond to time bins distributed over the  
1502 time axis, for a given visual stimulus.

1503

1504 For purposes of illustrating sparsity in our simulations, we computed lifetime sparsity for the three  
1505 natural movies and three drifting grating stimuli (SF=0.05 cpd, TF=4 Hz, orientation of 0, 45, and 90  
1506 degrees). Since gratings were presented for 2.5 seconds vs. 4.5 seconds for the movies, only the first 2.5  
1507 seconds of movie responses were used for this analysis (to enable equal comparison).

1508

1509

#### 1510 *Measurement of the excitatory currents in the model*

1511 To measure the currents flowing through the somata of biophysical cells, we used NEURON's function  
1512 SEClamp(), which provides a simple voltage clamp. Out of all 10,000 biophysical cells in a model, every  
1513 200th cell was voltage-clamped at the soma at -70 mV, to measure the excitatory current [7]. Thus, the  
1514 currents were recorded for 50 cells in such a simulation (e.g., cell ID 2, 202, 402, 602, 802, ..., 9802). The  
1515 currents were saved from the SEClamp() objects, at each simulation time step.

1516 For the measured current, the F0 (mean) and F1 (amplitude at the frequency of the stimulus)  
1517 components were obtained according to Ref. [7]. The current was averaged over trials and then cycle-  
1518 averaged. F0 was computed as the mean (over the cycle time) of the cycle-averaged current. F0 was  
1519 then subtracted from the cycle-averaged current, and the result was fit with a sinusoid function at the  
1520 stimulus frequency,  $b \sin(\omega t + \varphi)$ , where  $\omega = 2\pi\nu$  ( $\nu$  being the stimulus frequency). The F1  
1521 component value was taken as  $F_1 = 2|b|$ .

1522 For all-LIF models, we measured contribution of LGN synaptic inputs to the total excitatory synaptic  
1523 inputs as a proxy to the excitatory synaptic currents measured for the biophysical model. Specifically,  
1524 for each spike arriving to a synapse, that synapse contributed its weight to the accumulating sum for the  
1525 target cell; the sum was computed for synapses from LGN only or for all synapses and was normalized by  
1526 time and number of trials.

1527

1528

1529

1530

## 1531 **Methods References**

- 1532 [54] Richardson, R.J., Blundon, J.A., Bayazitov, I.T., and Zakharenko, S.S. Connectivity Patterns Revealed  
1533 by Mapping of Active Inputs on Dendrites of Thalamorecipient Neurons in the Auditory Cortex. *J.*  
1534 *Neurosci.* **29**, 6406–6417 (2009).
- 1535 [55] Schoonover, C.E. Comparative Strength and Dendritic Organization of Thalamocortical and  
1536 Corticocortical Synapses onto Excitatory Layer 4 Neurons. *J. Neurosci.* **34**, 6746–6758 (2014).
- 1537 [56] da Costa, N. and Martin, K.A.C. How Thalamus Connects to Spiny Stellate Cells in the Cat’s Visual  
1538 Cortex. *J. Neurosci.* **31**, 2925–2937 (2011).
- 1539 [57] Douglas, R.J., and Martin, K.A.C. Inhibition in cortical circuits. *Current Biology* **19**, R398–R402  
1540 (2009).
- 1541 [58] Spruston, N. Pyramidal neurons: dendritic structure and synaptic integration. *Nat. Rev. Neurosci.* **9**,  
1542 206–221 (2008).
- 1543 [59] Pfeffer, C.K., et al. Inhibition of inhibition in visual cortex: the logic of connections between  
1544 molecularly distinct interneurons. *Nature Neurosci.* **16**, 1068–1076 (2013).
- 1545 [60] Beierlein, M., Gibson, J.R., and Connors, B.W. Two Dynamically Distinct Inhibitory Networks in  
1546 Layer 4 of the Neocortex. *J. Neurophys.* **90**, 2987–3000 (2003).
- 1547 [61] Niell, C.M., Bonin, V., and Andermann, M.L. Functional Organization of Circuits in Rodent Primary  
1548 Visual Cortex. In *The New Visual Neurosciences*, Werner, J.S. and Chalupa, L.M., Eds. MIT Press (2013).
- 1549 [62] Liu, B. et al. Visual Receptive Field Structure of Cortical Inhibitory Neurons Revealed by Two-Photon  
1550 Imaging Guided Recording. *J. Neurosci.* **29**, 10520 – 10532 (2009).
- 1551 [63] Welles, O. Touch of Evil (United States: Universal - International). (1958).
- 1552 [64] Martin, D., Fowlkes, C., Tal, D., and Malik, J. A database of human segmented natural images and  
1553 its application to evaluating segmentation algorithms and measuring ecological statistics. *Proc. Eighth*  
1554 *IEEE Int. Conf. Comput. Vision. ICCV 2001* **2**, 416 – 423 (2001).
- 1555 [65] van Hateren, J.H., and van der Schaaf, A. Independent component filters of natural images  
1556 compared with simple cells in primary visual cortex. *Proc. Biol. Sci.* **265**, 359 – 366 (1998).
- 1557 [66] da Costa, N. M., Hepp, K., & Martin, K. A. C. A systematic random sampling scheme optimized to  
1558 detect the proportion of rare synapses in the neuropil. *Journal of Neuroscience Methods*, **180**, 77–81.  
1559 (2009).
- 1560 [67] Sterio, D. The unbiased estimation of number and sizes of arbitrary particles using the disector. *J*  
1561 *Microsc.* **134** (Pt 2), 127–136 (1984).
- 1562
- 1563 [68] Coleman, J.E., et al. Rapid Structural Remodeling of Thalamocortical Synapses Parallels Experience-  
1564 Dependent Functional Plasticity in Mouse Primary Visual Cortex. *J. Neurosci.* **30**, 9670–9682 (2010).

- 1565 [69] Howard, C., and Reed, M. Unbiased stereology (2nd ed.). New York. (2005).
- 1566 [70] Gray, E. G. Electron microscopy of synaptic contacts on dendrite spines of the cerebral cortex.  
1567 **183**, 1592–1593 (1959).
- 1568 [71] Colonnier, M. Synaptic patterns on different cell types in the different laminae of the cat visual  
1569 cortex. An electron microscope study. *Brain Research*, **9**, 268–287 (1968).
- 1570 [72] Mizuseki K, Sirota A, Pastalkova E, Buzsaki G. Theta oscillations provide temporal windows for local  
1571 circuit computation in the entorhinalhippocampal loop. *Neuron* **64**, 267–280 (2009).
- 1572 [73] Harris KD, Henze DA, Csicsvari J, Hirase H, Buzsaki G. Accuracy of tetrode spike separation as  
1573 determined by simultaneous intracellular and extracellular measurements. *J Neurophysiol* **84**, 401–414  
1574 (2000).
- 1575 [74] Pachitariu M, Steinmetz NA, Kadir S, Carandini M and Harris KD. Kilosort: realtime spike-sorting for  
1576 extracellular electrophysiology with hundreds of channels. *bioRxiv* dx.doi.org/10.1101/061481 (2016).
- 1577 [75] Hazan L, Zugaro M, Buzsaki G. Klusters, NeuroScope, NDManager: a free software suite for  
1578 neurophysiological data processing and visualization. *J Neurosci Methods* **155**, 207–216 (2006).
- 1579 [76] Rossant, C. et al. Spike sorting for large, dense electrode arrays. *Nat. Neurosci.* **19**, 634–641 (2016).
- 1580 [77] Kitamura K, Judkewitz B, Kano M, Denk W, Häusser M. Targeted patch-clamp recordings and single-  
1581 cell electroporation of unlabeled neurons in vivo. *Nat Methods* **5**, 61-67 (2008).
- 1582 [78] Judkewitz B, Rizzi M, Kitamura K, Häusser M. Targeted single-cell electroporation of mammalian  
1583 neurons in vivo. *Nat Protoc.* **4**, 862-869 (2009).
- 1584 [79] Long B, Li L, Knoblich U, Zeng H, Peng H. 3D Image-Guided Automatic Pipette Positioning for Single  
1585 Cell Experiments in vivo. *Sci Rep.* **5**, 18426 (2015).
- 1586 [80] Brainard, D.H. The Psychophysics Toolbox. *Spat Vis.* **10**, 433-436 (1997).
- 1587 [81] Fee, M.S., Mitra, P.P., Kleinfeld, D. Automatic sorting of multiple unit neuronal signals in the  
1588 presence of anisotropic and non-Gaussian variability. *J. Neurosci. Meth.*, **69**, 175-188 (1996).
- 1589 [82] Holt, G.R., and Koch, C. Electrical interactions via the extracellular potential near cell bodies. *J*  
1590 *Comput Neurosci.* **6**, 169-184 (1999).
- 1591
